# Supplementary material for: Quantitative Mass Spectrometry Characterizes Client Spectra of Components for Targeting of Membrane Proteins to and Their Insertion into the Membrane of the Human ER
Source: MDPI journal article supplement (doi:10.3390/ijms241814166), 2023-09-15
Supplement: s1 [file s1]

**Table S1**

| <b>MS run</b>        | <b>Project title</b>                                       | <b>Dataset identifier</b> | <b>Reference</b>     |
|----------------------|------------------------------------------------------------|---------------------------|----------------------|
| <b>Sample number</b> | <b>Sample description</b>                                  |                           |                      |
| <b>Orbi1763</b>      | <b>Clients of human TRAP complex</b>                       | <b>PXD008178</b>          |                      |
| Sample 1-3           | scr control siRNA                                          |                           | Nguyen et al., 2018  |
| Sample 4-6           | SEC61A1 siRNA #4                                           |                           | Nguyen et al., 2018  |
| Sample 7-9           | SEC61A1 siRNA #5                                           |                           | Nguyen et al., 2018  |
| <b>Orbi1931</b>      | <b>Clients of human TRAP complex</b>                       | <b>PXD008178</b>          |                      |
| Sample 1-3           | scr control siRNA                                          |                           |                      |
| Sample 4-6           | SEC63 siRNA #5                                             |                           | Schorr et al., 2019  |
| Sample 7-9           | SEC63 siRNA #7                                             |                           | Schorr et al., 2019  |
| Sample 10-12         | TRAPB siRNA #2                                             |                           | Nguyen et al., 2018  |
| Sample 13-15         | TRAPB siRNA #3                                             |                           | Nguyen et al., 2018  |
| Sample 16-18         | scr control siRNA                                          |                           |                      |
| Sample 19-21         | SEC62 siRNA #2                                             |                           | Schorr et al., 2019  |
| Sample 22-24         | SEC62 siRNA UTR                                            |                           | Schorr et al., 2019  |
| Sample 25-27         | TRAM siRNA #2                                              |                           | Klein et al., 2020   |
| Sample 28-30         | TRAM siRNA #6                                              |                           | Klein et al., 2020   |
| <b>Orbi1986</b>      | <b>Clients of human TRAP complex</b>                       | <b>PXD008178</b>          |                      |
| Sample 1-3           | scr control siRNA                                          |                           |                      |
| Sample 4-6           | SRA siRNA #3                                               |                           | Tirinci et al., 2022 |
| Sample 7-9           | SRA siRNA #6                                               |                           | Tirinci et al., 2022 |
| Sample 10-12         | TRAP siRNA #2                                              |                           | Nguyen et al., 2018  |
| Sample 13-15         | TRAP siRNA #3                                              |                           | Nguyen et al., 2018  |
| <b>Orbi2048</b>      | <b>Targeting of precursor polypeptides to the human ER</b> | <b>PXD008178</b>          |                      |
| Sample 1-3           | scr control siRNA                                          |                           |                      |
| Sample 4-6           | BIP siRNA CA                                               |                           | Schorr et al., 2019  |
| Sample 7-9           | BIP siRNA UTR#1                                            |                           | Schorr et al., 2019  |
| Sample 10-12         | SEC61A1 siRNA #4                                           |                           | Nguyen et al., 2018  |
| Sample 13-15         | SEC61A1 siRNA #5                                           |                           | Nguyen et al., 2018  |
| Sample 16-18         | scr control siRNA                                          |                           |                      |
| Sample 19-21         | WRB siRNA #3                                               |                           | Tirinci et al., 2022 |
| Sample 22-24         | WRB siRNA #4                                               |                           | Tirinci et al., 2022 |
| Sample 25-27         | WRB siRNA #4 + SND2 siRNA #2 = WS                          |                           | unpublished          |
| Sample 28-30         | WRB siRNA #4 + SND2 siRNA #3 = WS                          |                           | unpublished          |
| Sample 31            | control fibroblasts #1                                     |                           | Nguyen et al., 2018  |
| Sample 32            | control fibroblasts #2                                     |                           | Nguyen et al., 2018  |
| Sample 33            | CDG patient fibroblasts DSSR3                              |                           | Nguyen et al., 2018  |
| Sample 34            | CDG patient fibroblasts DSSR4 #1                           |                           | Nguyen et al., 2018  |
| Sample 35            | CDG patient fibroblasts DSSR4 #2                           |                           | Nguyen et al., 2018  |
| <b>Orbi2085</b>      | <b>Clients of human TRAP complex</b>                       | <b>PXD008178</b>          |                      |
| Sample 1-3           | scr control siRNA                                          |                           |                      |
| Sample 4-6           | TRAP siRNA #2                                              |                           | Nguyen et al., 2018  |
| Sample 7-9           | TRAP siRNA #3                                              |                           | Nguyen et al., 2018  |
| Sample 10-12         | TRAM siRNA #2                                              |                           | Klein et al., 2020   |
| Sample 13-15         | TRAM siRNA #6                                              |                           | Klein et al., 2020   |
| <b>Orbi2155</b>      | <b>Clients of human Sec62/Sec63 complex</b>                | <b>PXD012078</b>          |                      |
| Sample 1-3           | scr control siRNA                                          |                           |                      |
| Sample 4-6           | SEC62 siRNA #2                                             |                           | Schorr et al., 2019  |
| Sample 7-9           | SEC62 UTR siRNA                                            |                           | Schorr et al., 2019  |
| Sample 10-12         | SRA siRNA #3                                               |                           | Tirinci et al., 2022 |
| Sample 13-15         | SRA siRNA #6                                               |                           | Tirinci et al., 2022 |

| MS run          | Project title                                              | Dataset identifier | Reference            |
|-----------------|------------------------------------------------------------|--------------------|----------------------|
| Sample number   | Sample description                                         |                    |                      |
| <b>Orbi2288</b> | <b>mRNA targeting to the human ER</b>                      | <b>PXD011989</b>   |                      |
| Sample 1-3      | scr control siRNA                                          |                    | Bhadra et al., 2021  |
| Sample 4-6      | P180 siRNA #1                                              |                    | Bhadra et al., 2021  |
| Sample 7-9      | P180 siRNA #2                                              |                    | Bhadra et al., 2021  |
| <b>Orbi2314</b> | <b>mRNA targeting to the human ER</b>                      | <b>PXD011990</b>   | Bhadra et al., 2021  |
| Sample 1-3      | scr control siRNA                                          |                    |                      |
| Sample 4-6      | KTN1 siRNA #3                                              |                    | Bhadra et al., 2021  |
| Sample 7-9      | KTN1 siRNA #4                                              |                    | Bhadra et al., 2021  |
| Sample 10-12    | ERJ1 UTR siRNA #4                                          |                    | Bhadra et al., 2021  |
| Sample 13-15    | ERJ1 siRNA #6                                              |                    | Bhadra et al., 2021  |
| <b>Orbi2514</b> | <b>Targeting of precursor polypeptides to the human ER</b> | <b>PXD011993</b>   |                      |
| Sample 1-3      | scr control siRNA                                          |                    |                      |
| Sample 4-6      | SND2 siRNA #2                                              |                    | Tirinci et al., 2022 |
| Sample 7-9      | SND2 siRNA #3                                              |                    | Tirinci et al., 2022 |
| Sample 10-12    | WRB siRNA #3 + SND2 siRNA #2 = SW                          |                    | Tirinci et al., 2022 |
| Sample 13-15    | WRB siRNA #3 + SND2 siRNA #3 = SW                          |                    | Tirinci et al., 2022 |
| Sample 16-18    | HEK293 Mock CRISPR                                         |                    | Schorr et al., 2019  |
| Sample 19-21    | HEK293 SEC62 CRISPR                                        |                    | Schorr et al., 2019  |
| Sample 22-24    | HEK293 SEC63 CRISPR                                        |                    | Schorr et al., 2019  |
| <b>Orbi2695</b> | <b>Targeting of proteins to the human ER</b>               | <b>PXD12005</b>    |                      |
| Sample 1-3      | scr control siRNA                                          |                    | Zimmermann et al.,   |
| Sample 4-6      | PEX3 siRNA #1                                              |                    | Zimmermann et al.,   |
| Sample 7-9      | PEX3 siRNA #2                                              |                    | Zimmermann et al.,   |
| Sample 10-12    | control fibroblasts #3                                     |                    | Zimmermann et al.,   |
| Sample 13-15    | Zellweger patient fibroblasts DPEX3                        |                    | Zimmermann et al.,   |

We note that the siRNA numbering may be different from the siRNA numbering in the respective reference and that in some siRNA experiments the scrambled (scr) control siRNA served as negative control for several targets and, possibly, different references. Therefore, in these latter cases no reference is given.

**Table S2. Summary of clients as determined by MS and differential protein abundance analysis.**

| Clients of      | Clients with |           |          | Clients with |           |           | HP       | TA       |
|-----------------|--------------|-----------|----------|--------------|-----------|-----------|----------|----------|
| <b>SR</b>       | <b>24</b>    | <b>14</b> | <b>-</b> | <b>30</b>    | <b>10</b> | <b>17</b> | <b>3</b> | <b>-</b> |
| Total           | 54           |           |          |              |           |           |          |          |
| % of total      | 44.4 SP      |           |          | 55.6 TMH     |           |           |          |          |
| % of total      | 81.5 MP      |           |          |              |           |           |          |          |
| % of TMH        |              |           |          | 33.3         |           | 56.7      | 10       | -        |
| % of total      | 18.5sol      | 25.9      | -        | 18.5         |           | 31.5      | 5.6      | -        |
| <b>Snd2</b>     | <b>16</b>    | <b>8</b>  | <b>2</b> | <b>39</b>    | <b>5</b>  | <b>26</b> | <b>1</b> | <b>7</b> |
| Total           | 55           |           |          |              |           |           |          |          |
| % of total      | 29.1 SP      |           |          | 70.9 TMH     |           |           |          |          |
| % of total      | 89.1 MP      |           |          |              |           |           |          |          |
| % of TMH        |              |           |          | 12.8         |           | 66.7      | 2.6      | 17.9     |
| % of total      | 10.9sol      | 14.5      | 3.6      | 9.1          |           | 47.3      | 1.8      | 12.7     |
| <b>Snd2+Wrb</b> | <b>13</b>    | <b>5</b>  | <b>2</b> | <b>30</b>    | <b>3</b>  | <b>21</b> | <b>1</b> | <b>5</b> |
| Total           | 43           |           |          |              |           |           |          |          |
| % of total      | 30.2 SP      |           |          | 69.8 TMH     |           |           |          |          |
| % of total      | 86 MP        |           |          |              |           |           |          |          |
| % of TMH        |              |           |          | 10           |           | 70        | 3.3      | 16.7     |
| % of total      | 14sol        | 11.6      | 4.7      | 7            |           | 48.8      | 2.3      | 11.6     |
| <b>Wrb</b>      | <b>26</b>    | <b>11</b> | <b>2</b> | <b>44</b>    | <b>5</b>  | <b>29</b> | <b>2</b> | <b>8</b> |
| Total           | 70           |           |          |              |           |           |          |          |
| % of total      | 37.1 SP      |           |          | 62.9 TMH     |           |           |          |          |
| % of total      | 81.4 MP      |           |          |              |           |           |          |          |
| % of TMH        |              |           |          | 11.4         |           | 65.9      | 4.5      | 18.2     |
| % of total      | 18.6sol      | 15.7      | 2.9      | 7.1          |           | 41.4      | 2.9      | 11.4     |
| <b>PEX3</b>     | <b>28</b>    | <b>5</b>  | <b>1</b> | <b>22</b>    | <b>9</b>  | <b>7</b>  | <b>2</b> | <b>4</b> |
| Total           | 50           |           |          |              |           |           |          |          |
| % of total      | 56 SP        |           |          | 44 TMH       |           |           |          |          |
| % of total      | 56 MP        |           |          |              |           |           |          |          |
| % of TMH        |              |           |          | 40.9         |           | 31.8      | 9.1      | 18.2     |
| % of total      | 44sol        | 10        | 2        | 18           |           | 14        | 4        | 8        |
| <b>EMC</b>      | <b>11</b>    | <b>-</b>  | <b>2</b> | <b>48</b>    | <b>1</b>  | <b>45</b> | <b>-</b> | <b>2</b> |
| Total           | 59           |           |          |              |           |           |          |          |
| % of total      | 18.6 SP      |           |          | 81.3 TMH     |           |           |          |          |
| % of total      | 84.7 MP      |           |          |              |           |           |          |          |
| % of TMH        |              |           |          | 2.1          |           | 93.8      | -        | 4.2      |
| % of total      | 15.3sol      | -         | 3.4      | 1.7          |           | 76.3      | -        | 3.4      |

| Clients of         | Clients with |           |          | Clients with |               |           |    |          |
|--------------------|--------------|-----------|----------|--------------|---------------|-----------|----|----------|
|                    | SP           | SP/I      | SP/multi | TMH          | TMH/II or III | TMH/multi | HP | TA       |
| <b>Sec61</b>       | <b>197</b>   | <b>68</b> | <b>9</b> | <b>89</b>    | <b>44</b>     | <b>40</b> | -  | <b>5</b> |
| Total              | 286          |           |          |              |               |           |    |          |
| % of total         | 68.9 SP      |           |          | 31.1 TMH     |               |           |    |          |
| % of total         | 58.0 MP      |           |          |              |               |           |    |          |
| % of TMH           |              |           |          | 49.4         | 44.8          |           | -  | 5.7      |
| % of total         | 42.2sol      | 23.8      | 3.1      | 15.4         | 14.0          |           | -  | 1.7      |
| <b>TRAP</b>        | <b>67</b>    | <b>15</b> | <b>7</b> | <b>57</b>    | <b>13</b>     | <b>42</b> | -  | <b>2</b> |
| Total              | 124          |           |          |              |               |           |    |          |
| % of total         | 54.0 SP      |           |          | 46.0 TMH     |               |           |    |          |
| % of total         | 63.7 MP      |           |          |              |               |           |    |          |
| % of TMH           |              |           |          | 22.8         | 73.7          |           | -  | 3.5      |
| % of total         | 36.3sol      | 12.1      | 5.6      | 10.5         | 33.9          |           | -  | 1.6      |
| <b>TRAM1</b>       | <b>13</b>    | <b>2</b>  | <b>2</b> | <b>17</b>    | <b>10</b>     | <b>5</b>  | -  | <b>2</b> |
| Total              | 30           |           |          |              |               |           |    |          |
| % of total         | 43.3 SP      |           |          | 56.7 TMH     |               |           |    |          |
| % of total         | 70.0 MP      |           |          |              |               |           |    |          |
| % of TMH           |              |           |          | 58.8         | 29.4          |           | -  | 11.8     |
| % of total         | 30.0sol      | 6.7       | 6.7      | 33.3         | 16.7          |           | -  | 6.7      |
| <b>Sec62</b>       | <b>74</b>    | <b>17</b> | <b>4</b> | <b>27</b>    | <b>12</b>     | <b>15</b> | -  | -        |
| Total              | 101          |           |          |              |               |           |    |          |
| % of total         | 73.3 SP      |           |          | 26.7 TMH     |               |           |    |          |
| % of total         | 47.5 MP      |           |          |              |               |           |    |          |
| % of TMH           |              |           |          | 44.4         | 55.6          |           | -  | -        |
| % of total         | 52.5sol      | 16.8      | 3.9      | 11.9         | 14.9          |           | -  | -        |
| <b>Sec63</b>       | <b>32</b>    | <b>11</b> | <b>3</b> | <b>35</b>    | <b>13</b>     | <b>21</b> | -  | <b>1</b> |
| Total              | 67           |           |          |              |               |           |    |          |
| % of total         | 47.8 SP      |           |          | 52.2 TMH     |               |           |    |          |
| % of total         | 73.1 MP      |           |          |              |               |           |    |          |
| % of TMH           |              |           |          | 37.1         | 60.0          |           | -  | 2.9      |
| % of total         | 26.9sol      | 16.4      | 4.5      | 12.1         | 35.6          |           | -  | 1.7      |
| <b>Sec62+Sec63</b> | <b>19</b>    | <b>8</b>  | <b>-</b> | <b>11</b>    | <b>4</b>      | <b>7</b>  | -  | -        |
| Total              | 30           |           |          |              |               |           |    |          |
| % of total         | 63.3 SP      |           |          | 36.7 TMH     |               |           |    |          |
| % of total         | 63.3 MP      |           |          |              |               |           |    |          |
| % of TMH           |              |           |          | 36.4         | 63.6          |           | -  | -        |
| % of total         | 36.7sol      | 26.7      | -        | 13.3         | 23.3          |           | -  | -        |

I, II, III, membrane protein type; HP, hairpin; MP, membrane protein; multi, multispanning membrane protein; sol, soluble; SP, signal peptide; TA, tail anchor; TMH, most N-terminal transmembrane domain; Zellweger, data from PEX3 deficient patient fibroblasts Zimmermann et al. [38]. Notably, sol refers to soluble proteins, in the cases of Wrb and Snd2 clients to the pool of the respective single depletion (Snd2 or Wrb) and the double depletion (Snd2+Wrb). Sec62+Sec63 represents the client overlap between the two single depletions.

**Table S3. Characteristics of THM-containing clients of SR, Snd, Wrh, PEX3, and EMC.**

| Protein     | TMDs  | Type | TMH       | TMH Sequence                 | Size | %    | N | ERL-D | ΔG     |
|-------------|-------|------|-----------|------------------------------|------|------|---|-------|--------|
| <b>SR</b>   |       |      |           |                              |      |      |   |       |        |
| TMTC3       | multi | II   | 9-29      | ITLIVGVVTACYWNSLFCGFV        | 914  | 1.8  | + |       | 1.675  |
| B3GALT1     | 1     | II   | 7-27      | WWLLAPPALLALLTCSLAFGL        | 498  | 3.4  | + |       | -0.935 |
| SLC35B2     | multi |      | 5-25      | WWAVVVLAAAPSLGAGGETPE        | 432  | 3.5  |   |       | 3.884  |
| ERLIN2      | 1     | II   | 4-24      | LGAVVAVASSFFCASLFSAVH        | 339  | 4.1  | + |       | 1.947  |
| REEP3       | multi | HP   | 1-21      | MVSWMISRAVVLVFGMLYPAY        | 255  | 4.3  |   |       | 0.697  |
| SPTLC1      | 1     |      | 16-36     | ALYEAPAYHLILEGILILWII        | 513  | 5.1  |   |       | 1.444  |
| SLC16A3     | multi | II   | 18-38     | GGWGWAVLFGCFVITGFSYAF        | 465  | 6    |   |       | -0.663 |
| ZMPSTE24    | multi | III  | 19-39     | IFGAVLLFSWTVYLVWETFLAQ       | 475  | 6.1  |   |       | 1.532  |
| PDE3A       | multi | II   | 61-81     | LSSALCAGSLSFLLALLVRLV        | 1141 | 6.2  |   | 1     | -0.598 |
| ATP13A1     | multi | II   | 67-87     | VLPFAGLLYPAWLGAAGCW          | 1204 | 6.4  | + |       | 1.928  |
| TMEM209     | multi | II   | 28-48     | VVLAWGLLNVMAGMIYTEMT         | 561  | 6.8  | + |       | 1.535  |
| PEX3*       | 1     |      | 16-36     | CIFLGTVLGGVYILGKYQKK         | 373  | 7    |   |       | 3.594  |
| ABCC4       | multi | II   | 93-113    | LVLGIFTLIESAKVIQPIFL         | 1325 | 7.8  | + | 2     | 5.118  |
| ASPH        | 1     | II   | 54-74     | FFTWMFVIALLGWVTSVAVVW        | 758  | 8.4  | + |       | -1.493 |
| ATP2B1      | multi | II   | 98-118    | FLQLVWEALQDVTLLIIEIAA        | 1220 | 8.9  |   |       | 4.019  |
| ERGIC2      | multi | II   | 34-54     | GTVSLIAFTTMALLTIMEFSV        | 377  | 11.7 |   |       | 1.141  |
| LNPEP       | 1     | II   | 111-131   | MVVCASFVIVAVSVIMVIYLL        | 1025 | 11.8 |   |       | -2.599 |
| IKBIP       | 1     |      | 46-62     | CLSLLSLGTCLGLAWFV            | 377  | 14.9 | + |       | 0.469  |
| DEGS1       | multi | II   | 41-61     | PNLIWIIIMMVLTLQGAIFYV        | 323  | 15.8 |   |       | -0.478 |
| BST2        | 1     | II   | 21-48     | KLLLGIGILVLLIIVILGVPLIIFTIKA | 180  | 17.2 | + |       | -5.685 |
| TMEM41B     | multi | II   | 52-72     | MSLLILVSIFLSAAFVMFLVY        | 291  | 21.3 |   |       | -1.51  |
| TVP23B      | multi | II   | 34-53     | PVASFFHLFRVSAIIVYLL          | 205  | 21.5 |   |       | 1.886  |
| CEPT1       | multi | II   | 87-107    | LITHGLSINICTTILLVFYC         | 416  | 23.3 | + |       | -0.476 |
| ANO10       | multi | II   | 208-228   | IALYFGFLEYFTFALIPMAVI        | 660  | 32.7 |   |       | 1.133  |
| SUN1        | 1     | II   | 316-335   | ICKFLVLLIPLFLLLAGLSL         | 785  | 41.5 |   |       | -1.86  |
| TOR1AIP2    | 1     |      | 215-235   | FWSYGPVILVVLVAVVASSV         | 470  | 47.9 | + |       | -0.371 |
| YIPF5       | multi | II   | 125-145   | TDLAGPMVCLAFGATLLLAG         | 257  | 52.5 |   |       | 0.365  |
| CAV1        | 1     | HP   | 105-125   | ALFGIPMALIWGIYFAILSFL        | 178  | 64.4 |   |       | -0.726 |
| ITPR3       | multi | II   | 2203-2223 | LWGSISFNLAVFINIHAFFY         | 2671 | 82.9 | + |       | 0.138  |
| ATL2        | 1     | HP   | 477-497   | TLFAVMFAMYIISGLTGFIGL        | 583  | 83.5 | + |       | -0.074 |
| <b>Snd2</b> |       |      |           |                              |      |      |   |       |        |
| PTGIS       | 1     |      | 1-20      | MAWAALLGLLAALLLLLLLS         | 500  | 2.2  |   |       | -3.435 |
| MBOAT7      | multi | III  | 9-29      | LVVLLISIPIGFLFKKAGPGL        | 472  | 4    | + |       | 2.483  |
| SLC39A7     | multi | II   | 10-30     | WVAVGLLTWATLGLLVAGLGG        | 469  | 4.3  |   |       | 0.193  |
| SLC16A7     | multi | II   | 16-36     | GGWGWIVVGAAFISIGFSYAF        | 478  | 5.4  |   |       | -0.035 |
| GDPD4       | multi | II   | 18-38     | WVTFLGTGYWFFWSIFILSLA        | 520  | 5.4  | + |       | 0.185  |
| SLC9A6      | multi |      | 28-48     | LWLLAVGVFDWAGASDGGGG         | 679  | 5.6  | + |       | 3.829  |
| RHBDD2      | multi |      | 11-31     | WCLCEPVPSATFFTALLSLV         | 364  | 5.8  |   |       | 2.164  |
| AGPAT5      | multi |      | 15-35     | LLPSVLLGTAPTYVLAWGVW         | 364  | 6.9  |   |       | 1.565  |
| BCAP29      | multi | III  | 7-27      | AVATFLYAEIGLILIFCLPFI        | 241  | 7.1  |   |       | -0.863 |
| MYO9A       | 1     |      | 175-195   | IYTYVGSILIVINPFKFLPIY        | 2548 | 7.3  |   |       | 1.571  |
| SLC7A2      | multi | II   | 38-59     | DLIALGVGSTLGAGVYVLAGEV       | 658  | 7.3  | + |       | 2.693  |
| ATP2C1      | multi | II   | 71-91     | LWKKYISQFKNPLIMLLASA         | 919  | 8.8  |   |       | 4.913  |
| POMK        | 1     | II   | 21-43     | VGLLLIMALMNTLLYLCLDHFFI      | 350  | 8.9  | + |       | -0.095 |
| ATG9A       | multi | II   | 67-87     | IFELMQFLFVVAFTFLVSCV         | 839  | 9.2  | + |       | -0.147 |
| MXRA7       | 1     |      | 7-27      | LLAALPALATALALLLAWLLV        | 170  | 10   |   |       | -2.116 |
| PLD3        | 1     | II   | 39-59     | VLLVLILAVVVGFGALMTQLFL       | 490  | 10   | + |       | -1.979 |
| ATP12A      | multi | II   | 102-123   | EIVKFLKQMVGGFSILLWVGA        | 1093 | 10.3 |   |       | 3.561  |
| CXCR4       | multi | II   | 39-63     | IFLPTIYSHFLTIGVGNLVILVM      | 352  | 13.9 | + |       | -0.37  |
| PTDSS2      | multi | II   | 63-83     | AHTLTVLFLTCTLGYYTLLE         | 487  | 15   | + | 1     | -0.192 |
| TMEM33      | multi | II   | 32-52     | LFTVYCSALFVLPPLGLHEAA        | 247  | 17   | + |       | 0.388  |
| TMEM38B     | multi | III  | 50-70     | SWFTAMLHCFGGGILSCLLLA        | 291  | 20.6 |   |       | 0.584  |
| TMEM41B     | multi |      | 52-72     | MSLLILVSIFLSAAFVMFLVY        | 291  | 21.3 |   |       | -1.951 |
| REEP5       | multi | HP   | 35-55     | SFIALGVIGLVALYLVFGYGA        | 189  | 23.8 |   |       | -1.133 |
| SOAT1       | multi | II   | 141-159   | IYHMFIALILFILSTLVV           | 550  | 27.5 |   |       | -2.08  |
| PRAF2       | multi | II   | 42-62     | LYYQTNLYLLCFGIGLALAGYV       | 178  | 29.2 |   |       | 0.209  |
| TMEM181     | multi | II   | 153-173   | HFVLVFFVFFICFGLTIFVGI        | 475  | 34.4 |   |       | -2.195 |
| TRPM7       | multi | II   | 756-776   | NSWYKVISLIVPPAILLEY          | 1865 | 41.1 |   | 2     | 1.975  |
| LEMD2       | multi | II   | 213-233   | LLLWASLGLLVFLGILWVKM         | 503  | 44.3 |   |       | -3.464 |

|        |       |    |         |                          |      |      |   |  |        |
|--------|-------|----|---------|--------------------------|------|------|---|--|--------|
| STEAP4 | multi | II | 196-216 | LFPMWRFPPFYLSAVLCVFLFF   | 459  | 44.9 |   |  | -0.321 |
| SEC62  | multi | II | 197-217 | FVMGLILVIAVIAATLFPLWP    | 399  | 51.9 |   |  | -1.555 |
| SLC4A2 | multi | II | 708-731 | CLAAVIFYFAALSPAITFGGLLG  | 1241 | 57.9 | + |  | -0.458 |
| STX17  | multi |    | 229-249 | LAALPVAGALIGGMVGGPIGL    | 302  | 79.1 |   |  | 2.128  |
| C4orf3 | 1     | TA | 45-65   | SYWLDLWLFILFDVVVFLFVYFL  | 65   | 84.6 |   |  | -2.704 |
| VAMP8  | 1     | TA | 76-96   | MVLICVIVFIHILFIVLFAT     | 100  | 86   |   |  | -4.429 |
| VAMP4  | 1     | TA | 116-136 | IKAIMALVAAIILLVIIIIV     | 141  | 89.4 |   |  | -3.47  |
| EMD    | 1     | TA | 223-243 | VPLWGQLLLFLVFVIVLFFIY    | 254  | 91.7 |   |  | -2.85  |
| STX3   | 1     | TA | 264-284 | LIIHIVLVVVLLGILALIIGLSV  | 289  | 94.8 |   |  | -4.337 |
| STX2   | 1     | TA | 265-288 | WIIHAVSVVLVAIIALIIGLSVGK | 288  | 95.5 |   |  | -2.654 |
| JPH1   | 1     | TA | 640-660 | IMIVLVMLLNIGLAILFVHFL    | 661  | 98.3 |   |  | -1.838 |

#### Snd2+Wrb

|         |       |     |         |                           |      |      |   |   |        |
|---------|-------|-----|---------|---------------------------|------|------|---|---|--------|
| MBOAT7  | multi | III | 9-29    | LVVLLISIPIGFLFKKAGPGL     | 472  | 4    | + |   | 2.483  |
| SLC39A7 | multi |     | 10-30   | WVAVGLLTWATLGLLVAGLGG     | 469  | 4.3  |   |   | 0.193  |
| SLC16A7 | multi | II  | 16-36   | GGWGWIVVGAAFISIGFSYAF     | 478  | 5.4  |   |   | -0.035 |
| GDPD4   | multi | II  | 18-38   | WVTFLGTGYWFFWSIFILSLA     | 520  | 5.4  | + | 1 | 0.185  |
| SLC9A6  | multi |     | 28-48   | LWLLAVGVFDWAGASDGGGG      | 679  | 5.6  | + |   | 3.829  |
| RHBDD2  | multi |     | 11-31   | WCLCEVPSPATFTTALLSLV      | 364  | 5.8  |   |   | 2.164  |
| AGPAT5  | multi |     | 15-35   | LLPSVVLLGTAPTYVLAWGVW     | 364  | 6.9  |   |   | 1.565  |
| BCAP29  | multi | III | 7-27    | AVATFLYAEIGLILIFCLPFI     | 241  | 7.1  |   |   | -0.863 |
| ATP2C1  | multi | II  | 71-91   | LWKKYISQFKNPLIMLLASA      | 919  | 8.8  |   |   | 4.913  |
| POMK    | 1     | II  | 21-43   | VGLLLIMALMNTLLYLCLDHFFI   | 350  | 8.9  | + |   | -0.095 |
| ATG9A   | multi | II  | 67-87   | IFELMQFLFVVAFTTFLVSCV     | 839  | 9.2  | + |   | -0.147 |
| MXRA7   | 1     |     | 7-27    | LLAALPALATALALLLAWLLV     | 170  | 10   |   |   | -2.116 |
| PLD3    | 1     | II  | 39-59   | VLLVLILAVVGFGALMTQLFL     | 490  | 10   | + |   | -1.979 |
| ATP12A  | multi | II  | 102-123 | EIVKFLKQMVGGFSILLWVGA     | 1039 | 10.3 |   | 1 | 3.561  |
| CXCR4   | multi | III | 39-63   | IFLPTIYSIIFLTGIVGNGLVILVM | 352  | 13.9 | + |   | -0.37  |
| TMEM33  | multi | II  | 32-52   | LFTVYCSALFVPLPLGLHEAA     | 247  | 17   | + | 1 | 0.388  |
| TMEM38B | multi | III | 50-70   | SWFTAMLHCFGGGILSCLLLA     | 291  | 20.6 |   | 1 | 0.584  |
| REEP5   | multi | HP  | 35-55   | SFIALGVIGLVALYLVFYGA      | 189  | 23.8 |   |   | -1.133 |
| SOAT1   | multi | II  | 141-159 | IYHMFIALILFILSTLVV        | 550  | 27.5 |   |   | -2.08  |
| PRAF2   | multi | II  | 42-62   | LYYQTNYLCCFGIGLALAGYV     | 178  | 29.2 |   |   | 0.209  |
| TMEM181 | multi | II  | 153-173 | HFVLVFFVFFICFGLTIFVGI     | 475  | 34.4 |   |   | -2.195 |
| LEMD2   | multi | II  | 213-233 | LLWASLGLLLVFLGILWVKM      | 503  | 44.3 |   | 1 | -3.464 |
| STEAP4  | multi | II  | 196-216 | LFPMWRFPPFYLSAVLCVFLFF    | 459  | 44.9 |   |   | -0.321 |
| SEC62   | multi | II  | 197-217 | FVMGLILVIAVIAATLFPLWP     | 399  | 51.9 |   |   | -1.555 |
| STX17   | multi |     | 229-249 | LAALPVAGALIGGMVGGPIGL     | 302  | 79.1 |   |   | 2.128  |
| C4orf3  | 1     | TA  | 45-65   | SYWLDLWLFILFDVVVFLFVYFL   | 65   | 84.6 |   |   | -2.704 |
| EMD     | 1     | TA  | 223-243 | VPLWGQLLLFLVFVIVLFFIY     | 254  | 91.7 |   |   | -2.85  |
| STX3    | 1     | TA  | 264-284 | LIIHIVLVVVLLGILALIIGLSV   | 289  | 94.8 |   |   | -4.337 |
| STX2    | 1     | TA  | 265-288 | WIIHAVSVVLVAIIALIIGLSVGK  | 288  | 95.5 |   |   | -2.654 |
| JPH1    | 1     | TA  | 640-660 | IMIVLVMLLNIGLAILFVHFL     | 661  | 98.3 |   |   | -1.838 |

#### Wrb

|         |       |     |       |                         |     |     |   |   |        |
|---------|-------|-----|-------|-------------------------|-----|-----|---|---|--------|
| MBOAT7  | multi | III | 9-29  | LVVLLISIPIGFLFKKAGPGL   | 472 | 4   | + |   | 2.483  |
| SLC39A7 | multi |     | 10-30 | WVAVGLLTWATLGLLVAGLGG   | 469 | 4.3 |   |   | 0.193  |
| REEP3   | multi | HP  | 1-21  | MVSWMISRAVVLVFGMLYPAY   | 255 | 4.3 |   |   | 0.697  |
| EXT2    | 1     | II  | 26-46 | YITLFSIVLLGLIATGMFQFW   | 718 | 5   |   |   | -1.428 |
| GDPD4   | multi | II  | 18-38 | WVTFLGTGYWFFWSIFILSLA   | 520 | 5.4 | + | 1 | 0.185  |
| SLC16A7 | multi | II  | 16-36 | GGWGWIVVGAAFISIGFSYAF   | 478 | 5.4 |   |   | -0.035 |
| SLC9A6  | multi |     | 28-48 | LWLLAVGVFDWAGASDGGGG    | 679 | 5.6 | + |   | 3.829  |
| RHBDD2  | multi |     | 11-31 | WCLCEVPSPATFTTALLSLV    | 364 | 5.8 |   |   | 2.164  |
| AGPAT5  | multi |     | 15-35 | LLPSVVLLGTAPTYVLAWGVW   | 364 | 6.9 |   |   | 1.565  |
| BCAP29  | multi | III | 7-27  | AVATFLYAEIGLILIFCLPFI   | 241 | 7.1 |   |   | -0.863 |
| MFSD7   | multi | II  | 30-50 | WVFLLAISLLNCSNATLWLSF   | 559 | 7.2 |   |   | 0.335  |
| NEU1    | 1     |     | 20-41 | LGFWGGCRVWVFAAIFLLSLAA  | 415 | 7.2 | + |   | -1.467 |
| MFSD10  | multi | II  | 27-47 | VVFLGLLLDLLAFTLLPLLP    | 455 | 8.1 |   |   | -1.459 |
| ATP2C1  | multi | II  | 71-91 | LWKKYISQFKNPLIMLLASA    | 919 | 8.8 |   |   | 4.913  |
| POMK    | 1     | II  | 21-43 | VGLLLIMALMNTLLYLCLDHFFI | 350 | 8.9 | + |   | -0.095 |
| ATG9A   | multi | II  | 67-87 | IFELMQFLFVVAFTTFLVSCV   | 839 | 9.2 | + |   | -0.147 |
| PTDSS1  | multi | II  | 36-56 | FFYRPHITITLLSFTIVSLMYF  | 473 | 9.7 |   |   | 0.972  |
| MXRA7   | 1     |     | 7-27  | LLAALPALATALALLLAWLLV   | 170 | 10  |   |   | -2.116 |
| PLD3    | 1     | II  | 39-59 | VLLVLILAVVGFGALMTQLFL   | 490 | 10  | + |   | -1.979 |

|         |       |     |           |                           |      |      |   |   |        |
|---------|-------|-----|-----------|---------------------------|------|------|---|---|--------|
| ATP12A  | multi | II  | 102-123   | EIVKFLKQMVGGFSILLWVGA     | 1039 | 10.3 |   | 1 | 3.561  |
| CXCR4   | multi | III | 39-63     | IFLPTIYSIIFLTGIVGNGLVILVM | 352  | 13.9 | + |   | -0.37  |
| TMEM33  | multi | II  | 32-52     | LFTVYCSALFVLPPLGLHEAA     | 247  | 17   | + | 1 | 0.388  |
| TMEM38B | multi | III | 50-70     | SWFTAMLHCFGGGILSCLLLA     | 291  | 20.6 |   | 1 | 0.584  |
| REEP5   | multi | HP  | 35-55     | SFIALGVIGLVALYLVFGYGA     | 189  | 23.8 |   |   | -1.133 |
| SOAT1   | multi | II  | 141-159   | IYHMFIALILFILSTLVV        | 550  | 27.5 |   |   | -2.08  |
| PRAF2   | multi | II  | 42-62     | LYYQTNYLCCFGIGLALAGYV     | 178  | 29.2 |   |   | 0.209  |
| SGPP1   | multi | II  | 132-152   | FCFGTELGNELFYILFFPFWI     | 441  | 32.2 |   |   | 2.661  |
| TMEM181 | multi | II  | 153-173   | HFVLVFFVFFICFGLTIFVGI     | 475  | 34.4 |   |   | -2.195 |
| LBR     | multi | II  | 212-232   | VPGVFLIMFGLPVFLFLLLM      | 615  | 36.1 |   |   | -2.378 |
| SPCS2   | multi | II  | 87-107    | ICTISCFFAIVALIWDMHPF      | 226  | 42.9 |   |   | 1.255  |
| LEMD2   | multi | II  | 213-233   | LLLWASLGLLVFLGILWVKM      | 503  | 44.3 |   | 1 | -3.464 |
| STEAP4  | multi | II  | 196-216   | LFPMWRRPFYLSAVLCVFLFF     | 459  | 44.9 |   |   | -0.321 |
| SEC62   | multi | II  | 197-217   | FVMGLILVIAVIAATLFPLWP     | 399  | 51.9 |   |   | -1.555 |
| MARCH1  | multi | II  | 155-175   | IFCSVTFHVIAITCVVWSLYV     | 289  | 57.1 |   |   | 0.107  |
| STX17   | multi |     | 229-249   | LAALPVAGALIGGMVGGPIGL     | 302  | 79.1 |   |   | 2.128  |
| ITPR3   | multi | II  | 2203-2223 | LWGSISFNLAVFINIIAFFY      | 2671 | 82.9 |   | 1 | 0.138  |
| C4orf3  | 1     | TA  | 45-65     | SYWLDLWLFILFDVVVFLFVYFL   | 65   | 84.6 |   |   | -2.704 |
| UBE2J2  | 1     | TA  | 227-247   | GLLGALANLFVIVGFAAFAYTW    | 259  | 91.5 |   |   | -1.019 |
| EMD     | 1     | TA  | 223-243   | VPLWGQLLLFLVFVIVLFFIY     | 254  | 91.7 |   |   | -2.850 |
| FAR1*   | 1     | TA  | 466-483   | IRYGFNTILVILIWRIF         | 515  | 92.4 |   |   | -0.255 |
| STX3    | 1     | TA  | 264-284   | LIIIVLVVVLLGILALIIGLSV    | 289  | 94.8 |   |   | -4.337 |
| STX2    | 1     | TA  | 265-288   | WIIIAVSVVLVAIIALIIGLSVGK  | 288  | 95.5 |   |   | -2.654 |
| GOLGA5  | 1     | TA  | 699-719   | VFVIIYMALLHLWVMIVLLTYTP   | 731  | 97   |   |   | -2.261 |
| JPH1    | 1     | TA  | 640-660   | IMIVLVMLLNIGLAILFVHFL     | 661  | 98.3 |   |   | -1.838 |

### PEX3

|          |       |     |           |                          |      |      |   |   |        |
|----------|-------|-----|-----------|--------------------------|------|------|---|---|--------|
| AIFM2    | 1     |     | 7-27      | VESGALHVIVVGGGFGGIAAA    | 373  | 4.6  |   |   | 2.886  |
| COLEC12  | 1     | II  | 38-58     | FSIILLYILCALLTITVAILG    | 742  | 6.5  | + |   | -2.162 |
| CYBRD1   | multi | II  | 12-32     | LLGSALLVGFLSVIFALVWVL    | 286  | 7.7  | + |   | -2.348 |
| MAN1A1   | 1     | II  | 42-62     | FVLLLVSFAFITLFCGAIFFL    | 653  | 8    | + |   | -2.612 |
| ERMP1    | multi | II  | 64-84     | AGTGLSEVRAALGLALYLIAL    | 904  | 8.2  | + | 2 | 2.156  |
| DHRS7B   | 1     | II  | 18-38     | FITSTAILPLLFGCLGVFGLF    | 325  | 8.6  |   |   | -0.36  |
| ENPP1    | 1     | II  | 77-97     | VLSLVLSVCVLTITLGCIFGL    | 925  | 9.4  | + |   | -0.985 |
| ABCD3*   | multi | II  | 84-104    | GYLVLIAVMLVSRITYCDVWMI   | 659  | 14.3 | + | 1 | 1.38   |
| TMUB2    | multi | III | 36-56     | VMVVAGVVVLILALVLAWLST    | 321  | 14.3 |   |   | -2.382 |
| SGCD     | 1     | II  | 37-57     | FFVLLLMLILVNLAMTIWIL     | 256  | 18.4 |   |   | -3.808 |
| PXMP2*   | multi | II  | 31-51     | LYPVLTKAATSGILSALGNFL    | 195  | 21   |   |   | 3.63   |
| TMEM192  | multi | II  | 47-67     | TVIIVNLLWFHILVFVVLAFI    | 271  | 21   |   |   | -1.154 |
| TMEM237  | multi | II  | 227-247   | MIGLFSHGFLAGCAVWNIVVI    | 408  | 58.1 |   |   | 1.917  |
| PEX13*   | 1     |     | 227-251   | AATSAKSWPIFFFAVILGGPYLIW | 403  | 58.8 |   |   | 0.039  |
| TOR1AIP1 | 1     |     | 339-355   | WLLPLIAALASGSFWFF        | 583  | 59.9 |   |   | 0.705  |
| ATL1     | 1     | HP  | 450-470   | TLFVVIFITYVIAGVTGFIGL    | 558  | 82.4 |   |   | -0.573 |
| RTN3     | multi | HP  | 864-887   | LIMLLSLAASFVISVSYLILALL  | 1032 | 84.7 |   |   | -2.436 |
| VAMP3    | 1     | TA  | 78-98     | MWAIGITVLVIFIIIVWVV      | 100  | 88   |   |   | -4.236 |
| FAR1*    | 1     | TA  | 466-483   | IRYGFNTILVILIWRIFI       | 515  | 92.4 |   |   | -0.668 |
| STX6     | 1     | TA  | 235-255   | WCAIAILFAVLLVVLILFLVL    | 255  | 96.1 | + |   | -5.096 |
| ACBD5*   | 1     |     | 497-517   | GVLTFAIHWPFIAQWLVLVLYY   | 525  | 96.6 |   |   | -0.121 |
| CCDC136  | 1     | TA  | 1130-1150 | IFSLPLVGLLVVISALLWCWWA   | 1154 | 98.8 |   |   | -2.371 |

### EMC

|          |       |     |       |                       |      |     |   |   |        |
|----------|-------|-----|-------|-----------------------|------|-----|---|---|--------|
| PIEZO1   | multi | II  | 5-25  | VLGAVLYWLLLPALLAACLL  | 2521 | 1   | + | 2 | -1.673 |
| ALG10    | multi | II  | 7-27  | YYFSAALSCTFLVSCLLFSAF | 473  | 3.6 |   |   | -0.56  |
| LRRC8E   | multi | II  | 23-43 | WWDVLAEYLTVAAMLIGVFGC | 796  | 4.1 | + | 1 | 1.41   |
| GDE1     | multi |     | 4-24  | WEDQGGLLGPFSLLLVLLL   | 331  | 4.2 | + | 1 | 1.467  |
| SLC9A7   | multi |     | 22-42 | LLLLPLLLGWGLRVAAAASAS | 726  | 4.4 | + |   | 1.198  |
| PLPP2    | multi | II  | 5-25  | WVFLLDVLCLLVASLPFAIL  | 288  | 5.2 |   | 1 | -1.092 |
| SLC43A3  | multi | II  | 17-37 | LLECLGFAGVLFGWPSLVFVF | 491  | 5.5 | + |   | 0.374  |
| SLC44A1  | multi | II  | 31-51 | WLLLFILFCIGMGFCGFSIA  | 657  | 6.2 |   | 2 | -2.846 |
| SLC44A2* | multi | II  | 34-54 | IICCVFLLAIVGYVAVGIIA  | 706  | 6.2 | + | 1 | -1.55  |
| ATP11A   | multi | II  | 62-82 | PKNLFEQFRRVANFYLIIFL  | 1134 | 6.3 |   |   | 6.227  |
| ATP13A1* | multi | II  | 67-87 | VLFPAGLLYPAWLGAAAAGCW | 1204 | 6.4 |   | 1 | 1.928  |
| BCAP31   | multi | III | 7-27  | AVATFLYAEVFVLLLCIPFI  | 246  | 6.9 |   |   | -1.026 |
| BCAP29   | multi | III | 7-27  | AVATFLYAEIGLILIFCLPFI | 241  | 7.1 |   |   | -0.863 |

|                      |       |     |           |                          |      |      |   |   |        |
|----------------------|-------|-----|-----------|--------------------------|------|------|---|---|--------|
| SLC7A1               | multi | II  | 36-57     | DLVALGVGSLGAGVYVLAV      | 629  | 7.3  | + |   | 2.145  |
| TMEM19               | multi | II  | 15-35     | MITNIVILSLIICISLAFWII    | 336  | 7.4  |   | 1 | -2.479 |
| ABCC4                | multi | II  | 93-113    | LVLGIFTLIEESAKVIQPIFL    | 1325 | 7.8  |   | 1 | 5.118  |
| TMBIM6 <sup>+</sup>  | multi | II  | 30-50     | VYASFALCMFVAAAGAYVHMV    | 237  | 8.4  |   |   | 0.626  |
| ZDHHC6               | multi | II  | 25-45     | IILGVIAICSTMAMIDSVLW     | 413  | 8.5  |   |   | 0.605  |
| ATP2B4               | multi | II  | 93-113    | FLELVWEALQDVTLLIIEIAA    | 1170 | 8.8  |   | 1 | 4.199  |
| SGPL1                | 1     | III | 41-61     | LIAWSVVWTLIVWGYEFVF      | 568  | 9    |   |   | -0.178 |
| ATP2B1               | multi | II  | 106-126   | LQDVTLLIIEIAAIVSLGLS     | 1220 | 9.5  |   |   | 1.33   |
| ADCY9                | multi | II  | 118-138   | YALFYIGFACLLWSIYFAVHM    | 1353 | 9.5  | + | 1 | -0.71  |
| SLC6A6               | multi | II  | 50-70     | FVLSVAGGFVGLGNVWRFPYL    | 620  | 9.7  |   |   | 1.981  |
| TM4SF1               | multi | II  | 10-30     | IGHSLVGLALLCIAANILLYF    | 202  | 9.9  | + |   | -0.789 |
| CD9                  | multi | II  | 13-33     | LLFGFNFIWLAGIAVLAIGL     | 228  | 10.1 | + | 1 | -1.351 |
| SLC1A3               | multi | II  | 48-68     | NAFVLLTVTAVIVGTILGFTL    | 542  | 10.7 |   |   | -0.753 |
| TMEM97               | multi | II  | 10-30     | VEWLLGLYFLSHIPITLFMDL    | 176  | 11.4 |   |   | 1.248  |
| SLC38A5              | multi | II  | 49-71     | SFGMSVFNLNAIMGSGILGLAY   | 472  | 12.7 |   |   | 3.308  |
| DIRC2                | multi | II  | 52-72     | WLVLLLSLLAFVQGLVWNTW     | 478  | 13   |   |   | -1.075 |
| ATP6V0C              | multi | III | 11-33     | ASFFAVMGASAAAMVFSALGAAYG | 155  | 13.5 |   |   | 1.35   |
| CXCR4                | multi | III | 39-63     | IFLPTIYSIIFLTGIVGNLVLVM  | 352  | 14.5 | + |   | -0.37  |
| MYADM                | multi | II  | 41-61     | LLQLVSTCVAFSLVASVGAWT    | 322  | 15.8 |   |   | 0.783  |
| EBP                  | multi | III | 29-49     | WHILAGLFSVTGVLVTTWLL     | 230  | 17   |   |   | -0.37  |
| SLC38A1              | multi | II  | 75-97     | MSVFNLNAIMGSGILGLAFALA   | 487  | 17.5 |   |   | 1.72   |
| ATP13A3 <sup>+</sup> | multi | II  | 206-226   | LLIKEVLNPFYIFQLFSVILW    | 1226 | 17.6 |   |   | 2.516  |
| CLCN3                | multi | II  | 209-232   | MNYIMYIFWALSFAFLAVSLVKVF | 818  | 26.9 | + |   | -1.206 |
| SOAT1 <sup>+</sup>   | multi | II  | 139-160   | RTIYHMFIALILFILSTLVVD    | 550  | 27.1 |   |   | -2.49  |
| ANO6 <sup>‡</sup>    | multi | II  | 301-321   | WLGYYTQMLLLAAVVGACFL     | 910  | 34.2 | + | 2 | -0.732 |
| YIPF3                | multi | II  | 149-169   | IAGELYGPLMLVFTLVAILLH    | 350  | 45.4 | + | 1 | 0.961  |
| TCIRG1               | multi | II  | 386-404   | VNPAPYTIITFPFLFAVMF      | 830  | 47.6 |   | 1 | 2.643  |
| ATP6V0A1             | multi | II  | 389-407   | INPAPYTIITFPFLFAVM       | 837  | 47.7 |   | 1 | 3.192  |
| SLC4A2 <sup>+</sup>  | multi | II  | 708-731   | CLAAVIFIYFAALSPAITFGGLLG | 1241 | 57.9 | + |   | -0.458 |
| ABCG2                | multi | II  | 396-416   | IAQIIVTVVLGLVIGAIYFGL    | 655  | 62   | + | 1 | -1.275 |
| TMEM199 <sup>+</sup> | multi | II  | 146-166   | LVITIFNFIVTVVAAFVCTYL    | 208  | 75   |   |   | -0.893 |
| MOSPD1               | multi | II  | 159-179   | SLLTVFLGVVCIAALMLPTLG    | 213  | 79.3 |   |   | -1.284 |
| ITPR1                | multi | II  | 2283-2335 | FWSSISFNLAFLMNLLVAFFYPF  | 2758 | 83.1 |   | 1 | 0.424  |
| ZFPL1                | 1     | TA  | 267-287   | LLLLLGLLGLFALLALMSRLG    | 310  | 89.4 |   |   | -3.489 |
| FDFT1                | 1     | TA  | 384-404   | PIYLSFVMLLAALSWQYLTTL    | 417  | 94.5 |   |   | 0.069  |

**Component** (protein in **bold** face); Client protein; TMDs, number of transmembrane domains in client (including TMH); 1, single spanning; multi, multispanning; Type, membrane protein type; HP, hairpin; TA, tail anchor; TMH, most N-terminal transmembrane domain; TMH Sequence, primary structure of TMH; Size, number of amino acid residues of client; %, distribution of TMH in client (i.e. position of central amino acid residue of TMH in % of client primary structure); N, N-glycosylation; ERL-D, number of ER luminal domains with a content of > 50 amino acid residues; ΔG, apparent Delta G for membrane insertion of TMHs (<http://dgpred.cbr.su.se>); highlights peroxisomal membrane proteins among the SR, Wrb and PEX3 clients; <sup>‡</sup> highlights overlap with Sec61 clients; <sup>+</sup> highlights overlap with TRAP clients. Notably, Wrb and Snd2 refers to the pool of clients that were detected in the respective single depletion (Snd2 or Wrb) and the double depletion (Snd2+Wrb). MP types shown in red were determined by employing the most advanced prediction tool for this purpose (<https://dtu.biolib.com/DeepTMHMM/>).



**Table S4. Characteristics of THM-containing clients of Sec61, TRAP, TRAM1, Sec62, and Sec63.**

| Protein      | TMDs  | Type | TMH     | TMH Sequence              | Size | %    | N | ERL-D | ΔG     |
|--------------|-------|------|---------|---------------------------|------|------|---|-------|--------|
| <b>Sec61</b> |       |      |         |                           |      |      |   |       |        |
| ERAP1        | 1     | II   | 2-21    | VFLPLKWSLATMSFLLSLL       | 948  | 1.3  | + |       | 1.904  |
| ANPEP        | 1     | II   | 9-31    | KSLGILGILLGVAAVCTIILSVV   | 967  | 2.1  | + |       | -1.669 |
| SLC20A2      | multi | III  | 6-26    | YLWMVILGFIIAFILAFSVGA     | 652  | 2.5  |   |       | -2.740 |
| CNNM3        | multi | II   | 11-27   | LGWLF AALCLGNAAGEA        | 707  | 2.7  | + | 1     | 2.395  |
| ABCC3        | multi | III  | 33-53   | TENPDLTPCFQNSLLAWVPCI     | 1527 | 2.8  | + |       | 7.305  |
| GALNT2       | 1     | II   | 7-24    | MLLCFAFLWVLGIAYMY         | 571  | 2.8  |   |       | -1.679 |
| GOLIM4       | 1     | II   | 13-33   | IFQTLTLLTVVFGFLYGAMLY     | 696  | 3.3  | + |       | -1.635 |
| GALNT1       | 1     | II   | 9-28    | VVLATSLIWVLLDMFLLLYF      | 559  | 3.4  | + |       | -0.953 |
| NCEH1        | 1     | II   | 5-25    | CVLLTALVALAAYVYIPLPG      | 408  | 3.7  | + |       | 0.724  |
| KIAA0319L    | multi | II   | 30-50   | SLYLFYTCFCFVSLWSTDAS      | 1049 | 3.8  | + | 1     | 0.07   |
| CLPTM1L      | multi | II   | 11-31   | LVVGVFVVYVHTCWVMYGIV      | 538  | 3.9  | + | 1     | 1.222  |
| MGAT1        | 1     | II   | 7-29    | AGLVLWGAILFVAWNALLLFFW    | 445  | 4    |   |       | -2.889 |
| SLC30A1      | multi | II   | 11-31   | LLCMLALTFMFMVLEVVS RV     | 507  | 4.1  | + |       | -0.684 |
| ERLIN2       | 1     | II   | 4-24    | LGAVVAVASSFFCASLFS AVH    | 339  | 4.1  | + |       | 1.947  |
| SCARB1       | multi | II   | 12-32   | GALGVAGLLCAVLGAVMIVMV     | 509  | 4.3  | + | 1     | -0.453 |
| MGAT2        | 1     | II   | 10-29   | VLILTLVVAACGFVLWSSNG      | 447  | 4.5  | + |       | 0.142  |
| SLC2A1       | multi | II   | 12-33   | LMLAVGGAVLGS LQFGYNTGVI   | 492  | 4.5  | + |       | 2.962  |
| SLC39A9      | multi | III  | 4-24    | FISISLLSLAMLVGCYVAGII     | 307  | 4.6  | + |       | -0.312 |
| PIGG         | multi | II   | 432-452 | IYSMMVGT VVVLEVLTLLLSV    | 983  | 5    | + |       | -0.489 |
| ERLIN1       | 1     | III  | 8-28    | VLVA AVVGLVAVLLYASIHKI    | 348  | 5.2  | + |       | 0.278  |
| B3GAT3       | 1     | II   | 8-28    | VFLAYFLVSIAGLLYALVQLG     | 335  | 5.4  | + |       | -0.348 |
| HS2ST1       | 1     | II   | 12-28   | LQLLAVVAFAVAMLFLE         | 356  | 5.6  | + |       | 0.105  |
| CASC4        | 1     | II   | 15-35   | SLVLVLLVVIVVLA FNYSI      | 436  | 5.7  |   |       | -2.517 |
| MOGS         | 1     | II   | 39-59   | STAGGVALAVVVL SLALGMSG    | 837  | 5.9  | + |       | 0.513  |
| SLC16A3      | multi |      | 18-38   | GGWGWAVLFGCFVITGFSYAF     | 465  | 6    |   |       | -0.663 |
| GOLM1        | 1     | II   | 13-35   | SPPLVLAALVACIIVLGFNYWIA   | 401  | 6    | + |       | -1.479 |
| IMPAD1       | 1     | II   | 13-33   | VAVFCLLGLGVLYHLYSGFLA     | 359  | 6.4  | + |       | 0.616  |
| ATP13A1*     | multi | II   | 67-87   | VLPFAGLLYPAWLGAAAAGCW     | 1204 | 6.4  | + | 1     | 1.928  |
| ATP11C       | multi | II   | 67-85   | FRRIANFYFLIIFLVQVTV       | 1132 | 6.7  |   | 2     | 0.357  |
| NEU1         | 1     |      | 19-42   | ILFGWGGCRVWVFAAIFLLSLAA   | 415  | 7.2  | + |       | -1.607 |
| SLC7A2       | multi | II   | 38-59   | DLIALGVGSTL GAGVYVLAGEV   | 658  | 7.3  | + |       | 2.693  |
| ERMP1        | multi | II   | 64-84   | AGTGLSEVRAALGLALYLI AL    | 904  | 8.2  | + | 2     | 2.156  |
| ASPH         | 1     | II   | 54-74   | FFTWMVIALLGWTSVAVVW       | 758  | 8.4  | + |       | -1.493 |
| SLC25A40     | multi | II   | 19-39   | MLASCTGAILTSVIVTPLDVV     | 338  | 8.6  |   |       | 2.013  |
| B4GALT1      | 1     | II   | 25-44   | LLVAVCALHLGVTLVYLAG       | 398  | 8.8  | + |       | 0.011  |
| TMEM38B      | multi | III  | 20-33   | FFDIAHYLVSVMAV            | 291  | 9.3  |   |       | 4.829  |
| ERGIC3       | multi | II   | 26-46   | GGATVTIVSGLMLLLFLSEL      | 383  | 9.4  | + | 1     | 0.098  |
| GGCX         | multi | II   | 61-81   | PASLAVFRFLFGFLMVDIPQ      | 758  | 9.4  | + | 2     | 1.521  |
| CLN5         | 1     | II   | 24-44   | ASWCWALALLWLAVVPGWSRV     | 358  | 9.5  | + |       | -0.338 |
| PLD3         | 1     | II   | 39-59   | VLLVLILAVVGFGALMTQLFL     | 490  | 10   | + |       | -1.979 |
| LYRIC        | 1     | III  | 49-69   | GWVILVGTGALGLLLFLLG Y     | 582  | 10.1 |   |       | -2.037 |
| TFRC         | 1     | II   | 68-88   | YGTIAVIVFFLIGFMIGYLG Y    | 760  | 10.3 | + |       | -1.75  |
| ECE1         | 1     | II   | 69-89   | LVVLVLLAAGLVACLAALGI      | 770  | 10.3 | + |       | -1.991 |
| TMEM43       | multi | II   | 32-52   | TSGGMFVGLMAFLLSFYLIFT     | 400  | 10.5 |   |       | -0.666 |
| SLC12A2      | multi | II   | 287-313 | ESKGVVKFGWIKGVLRCLNIWGV M | 1212 | 10.6 |   | 1     | 4.649  |
| ITFG3        | 1     | II   | 50-70   | AAFFLSLFLCLFVVFVVSFVI     | 552  | 10.9 | + |       | -2.892 |
| ERGIC2       | multi | II   | 34-54   | GTVSLIAFTTMALLTIMEFSV     | 377  | 11.7 |   | 1     | 1.141  |
| LNPEP        | 1     | II   | 111-131 | MVVC AFVIVAVSVIMVIYLLPRCT | 1025 | 11.8 | + |       | -2.784 |
| SLC12A4      | multi | II   | 119-139 | GTLMGVYLPCLQNIFGVILFL     | 1085 | 11.9 | + | 2     | 2.61   |
| SPCS3        | 1     | II   | 12-32   | FAFSLSVMAALTFGCFITTA F    | 180  | 12.2 | + |       | -0.437 |
| GPRC5A       | multi | III  | 34-54   | AEAWGVLET VATAGVVT SVA    | 357  | 12.3 | + |       | 3.613  |
| P4HTM        | 1     | II   | 61-81   | FLVLMVFVHLYLGNVLALLF      | 563  | 12.6 | + |       | -0.816 |
| ERGIC1       | multi | II   | 27-47   | IISICCLFILFLFSEL TGF      | 290  | 12.8 | + | 1     | -1.518 |
| CANT1        | 1     | II   | 45-62   | VILTFVGAAILWLLCSH         | 401  | 13.2 | + |       | -0.542 |
| MAN1B1       | 1     | II   | 85-105  | MILFLAFLLCGLLFYINLA       | 699  | 13.6 |   |       | -3.78  |
| GPX8         | 1     |      | 18-40   | VFAVLLSIVLCTVTLFLLQLKFL   | 209  | 13.9 |   |       | -2.349 |
| CXCR4        | multi | III  | 39-63   | IFLPTIYSIIFLTGIVGNGLVILVM | 352  | 14.2 | + |       | -0.37  |
| IKBIP        | 1     | II   | 46-62   | CLSLLSLGTCLGLAWFV         | 377  | 14.3 | + |       | 0.469  |
| CD70         | 1     | II   | 18-38   | VLRAALVPLVAGLVICLVVCI     | 193  | 14.5 | + |       | -0.925 |
| SEC11A       | 1     | II   | 17-36   | QLYYQVLNFGMIVSSALMIW      | 185  | 14.6 |   |       | 2.116  |
| VKORC1L1     | multi |      | 17-37   | VARYAVCAAGILLSIYAYHVE     | 176  | 15.3 |   |       | 1.029  |

|                     |       |    |           |                                 |      |      |   |   |        |
|---------------------|-------|----|-----------|---------------------------------|------|------|---|---|--------|
| TMEM30A             | multi |    | 50-70     | VLPIFFIIGLIFIPIGIGIFV           | 361  | 16.6 | + | 1 | -1.855 |
| TMBIM6 <sup>+</sup> | multi | II | 30-50     | VYASFALCMFVAAAAGAYVHMOV         | 237  | 16.9 |   |   | 0.626  |
| BST2                | 1     | II | 21-48     | KLLLGIGILVLLIIVILGVPLIIFTIKA    | 180  | 18.9 | + |   | -5.685 |
| CKAP4               | 1     | II | 107-127   | ALNFLFYALVAAAAFSGWC             | 602  | 19.4 |   |   | -0.004 |
| ABHD12              | 1     | II | 75-95     | ILFCVLGLYIAIPFLIKLCPGI          | 398  | 21.4 | + |   | 0.162  |
| SCD                 | multi | II | 73-93     | WRNIILMSLLHLGALYGITLI           | 359  | 23.1 |   |   | 0.341  |
| HTRA2               | 1     | II | 105-125   | AWLAVALGAGGAVLLLLWGCG           | 458  | 25.1 |   |   | -0.82  |
| SUN2                | 1     | II | 213-233   | FLWFLLPLLLLTCLTYGAWYF           | 717  | 31.1 | + |   | -3.06  |
| TOR4A               | 1     | II | 122-138   | CLLLLAIVGFQVLNAIENLDDNAQRY      | 423  | 31.9 |   |   | 5.049  |
| FADS2               | multi | II | 132-152   | FFLLLLAHIIALESIAWFTVF           | 444  | 32   |   |   | -1.58  |
| ANO6 <sup>+</sup>   | multi | II | 301-321   | WLGYYTQMLLLAAVVGACFL            | 910  | 34.2 | + | 2 | -0.732 |
| SFXN1               | multi | II | 103-120   | ITGCMMTFYRTTPAVLFW              | 322  | 34.8 |   |   | 4.764  |
| TOR1AIP1            | 1     |    | 339-355   | LLPLIAALASGSFWFF                | 583  | 38.6 |   |   | 1.307  |
| SPCS2               | multi | II | 87-107    | ICTISCFFAIVALIWDYMHPF           | 226  | 42.9 |   |   | 1.255  |
| STEAP3              | multi | II | 208-228   | LLPAWKVPTLLALGLFVCFYA           | 488  | 44.7 | + |   | 0.176  |
| TOR1AIP2            | 1     |    | 215-235   | FWSYGPVILVVLVAVVASSV            | 470  | 47.9 | + |   | -0.371 |
| YIF1A               | multi | II | 139-159   | LYIPTMAFITVYLLAGMALGI           | 293  | 50.9 |   |   | -0.202 |
| LEMD3               | multi | II | 475-495   | MFLLLTAACFLFLLGLTYLGM           | 911  | 53.2 |   | 1 | -3.427 |
| CLPTM1              | multi | II | 355-375   | YLLALTIHVSIVHSVFELAF            | 669  | 54.6 | + | 1 | 0.339  |
| DNAJB12             | 1     | II | 244-264   | LGVFVQLMPILILVLSALSQ            | 375  | 67.7 |   |   | 0.462  |
| ITPR3               | multi | II | 2203-2223 | LWGSISFNLAVINIIIAFFY            | 2671 | 82.9 |   | 1 | 0.138  |
| FAR1                | 1     | TA | 466-483   | IRYGFNTILVILIWRIF               | 515  | 92.4 |   |   | -0.255 |
| STX6                | 1     | TA | 235-255   | VSHMTSDRRQWCAIAILFAVLLVVLILFLVL | 255  | 96.1 |   |   | -1.56  |
| MOSPD2              | 1     | TA | 497-518   | LLLSLTMLLLAFVTSFFYLLYS          | 518  | 97.9 |   |   | -2.495 |
| CDKAL1              | 1     | TA | 556-578   | DCALRMSVGLALLGLLFAFFVKVY        | 579  | 97.9 |   |   | -1.466 |
| FNDC3B              | 1     | TA | 1182-1202 | IIVLGFATLSILFAFILQYFLM          | 1204 | 99   |   |   | -2.09  |

## TRAP

|                      |       |     |         |                           |      |      |   |   |        |
|----------------------|-------|-----|---------|---------------------------|------|------|---|---|--------|
| SLC38A10             | multi | II  | 4-24    | AAASNWGLITNIVNSIVGVSV     | 1119 | 1.3  |   |   | 5.0    |
| LMBRD2               | multi | III | 6-21    | LGLEIVFVFFLALFLL          | 695  | 2    | + |   | -1.255 |
| FAM20B               | 1     | II  | 7-25    | VVLLAILLVIFFTKVFLI        | 409  | 3.9  | + |   | -2.577 |
| SLC2A1               | multi | II  | 12-33   | LMLAVGGAVLGLSLQFGYNTGVI   | 492  | 4.5  | + |   | 2.962  |
| TPST2                | 1     | II  | 9-25    | LLAAGCALVVLAVQLG          | 377  | 4.5  | + |   | 0.07   |
| ARMC10               | 1     |     | 5-27    | RGAGWVAAGLLLGAGACYCIYRL   | 343  | 4.7  |   |   | -0.863 |
| SLC2A10              | multi | II  | 16-36   | LLGGLTFGYELAVISGALLPL     | 541  | 4.8  |   | 1 | 1.57   |
| WLS                  | multi | II  | 16-36   | IVGGILLVFQIIAFLVGGLIA     | 541  | 4.8  |   | 1 | -0.518 |
| GLT8D1               | 1     | II  | 8-28    | IIILVLAVALFLLVLHNNFLS     | 371  | 4.9  | + |   | -0.938 |
| EXT2                 | 1     | II  | 26-46   | YITLFSIVLLGLIATGMFQFW     | 718  | 5    | + |   | -1.428 |
| C1GALT1              | 1     |     | 7-29    | LNFLTFLCGSAIGFLLCSQLFSI   | 363  | 5    |   |   | -0.432 |
| ARMCX6               | 1     |     | 7-27    | VGWMAAGLMIGAGACYCVYKL     | 300  | 5.7  |   |   | 0.453  |
| ATP2A3               | multi | II  | 49-69   | LWELVLEQFEDLLVRILLAA      | 999  | 5.9  |   |   | 4.042  |
| SLC44A2 <sup>+</sup> | multi | II  | 34-54   | IICCVFLLLAIVGYVAVGIIA     | 706  | 6.2  | + | 2 | -1.55  |
| SLC39A11             | multi | III | 12-32   | LLGTFFTWMGTAAGAALVFVF     | 342  | 6.4  |   |   | 0.417  |
| NEU1                 | 1     |     | 19-42   | ILFWGGGCRVWVFAIFLLSLAA    | 415  | 7.2  | + |   | -1.607 |
| CHRM2                | multi | III | 23-45   | VVFIVLVAGLSLVITIIGNILVM   | 466  | 7.3  | + |   | 0.049  |
| CDIPT                | multi | II  | 6-26    | IFLFPNLIYGARIVFAIISF      | 213  | 7.5  |   |   | 1.964  |
| MFSD10               | multi | II  | 27-47   | VVFLGLLDLLAFTLLPLLP       | 455  | 8.1  |   |   | -1.459 |
| SLC22A18             | multi | II  | 26-46   | LLTYVLAATELTCLFMQFSI      | 424  | 8.5  |   |   | 1.373  |
| SLC7A14              | multi | II  | 58-78   | ISLGVGSCVGTGMYVVVSGLV     | 771  | 8.8  | + |   | 3.664  |
| STT3B                | multi | II  | 66-85   | AGWQSLLSFTILFLAWLAGF      | 826  | 9.2  | + | 2 | -0.173 |
| CD63                 | multi | II  | 12-32   | LLYVLLLAFCACAVGLIavg      | 238  | 9.2  | + | 1 | -2.096 |
| ATP1A2               | multi | II  | 86-106  | EWVKFCRQLFGGFSILLWIGA     | 1020 | 9.4  |   |   | 2.551  |
| LPCAT4               | multi | II  | 40-62   | CLLGALLAPIRVLLAFIVLFLW    | 524  | 9.7  | + |   | -2.51  |
| TRAM1                | multi | II  | 30-50   | VAMVFLGLLMFEITAKASIIF     | 374  | 10.7 | + |   | 1.364  |
| HM13                 | multi | III | 32-52   | IALAYGSLLLMALLPIFFGAL     | 377  | 11.1 | + |   | -1.32  |
| LNPEP                | 1     | II  | 111-131 | MVVCAFVIVVAVSVIMVIYLLPRCT | 1025 | 11.8 | + |   | -2.784 |
| CHST14               | 1     |     | 40-60   | LLPSMLMFAVIVASSGLLLMI     | 376  | 13.3 | + |   | -0.887 |
| TMEM205              | multi | III | 18-38   | VLSGAWGMQMWWTVFVSGFLF     | 189  | 14.8 |   |   | 1.573  |
| DEGS1                | multi | II  | 41-61   | PNLIWIIIMVLTQLGAFYIV      | 323  | 15.8 |   |   | -0.478 |
| TMEM39A              | multi | II  | 72-92   | SLLFEFLFFIYLLVALFIQYI     | 488  | 16.8 | + |   | -1.702 |
| TMBIM6 <sup>+</sup>  | multi | II  | 30-50   | VYASFALCMFVAAAAGAYVHMOV   | 237  | 16.9 |   |   | 0.626  |
| ATP13A3 <sup>+</sup> | multi | II  | 206-226 | LLIKEVLNPFYIFQLFSVILW     | 1226 | 17.6 |   |   | 2.516  |
| SGPP1                | multi | II  | 133-152 | CFGTELGNELFYILFFPFWI      | 441  | 20.4 |   |   | 2.995  |
| TMEM189              | multi | II  | 48-68   | WCSVILCFSLIAHNLVHLLLL     | 271  | 21.4 |   | 1 | 0.867  |
| KCNJ2                | multi | II  | 82-106  | RWMLVIFCLAFVLSWLFPGCVFWLI | 427  | 22   |   |   | -4.554 |

|          |       |    |           |                          |      |      |   |   |        |
|----------|-------|----|-----------|--------------------------|------|------|---|---|--------|
| SGMS2    | multi | II | 80-100    | IAFIYAVFNLVLTVMITVV      | 365  | 24.7 |   |   | 0.258  |
| TSPAN10  | multi | II | 79-99     | IFLSNFPFSLGLLALAI        | 355  | 25.1 | + | 1 | 0.631  |
| TMEM223  | multi | II | 44-64     | FTILGLFCAGQGVFWASMAV     | 202  | 26.7 |   |   | 1.206  |
| SOAT1+   | multi | II | 139-160   | RTIYHMFIALILFILSTLVVD    | 550  | 27.1 |   |   | -2.49  |
| TMEM166  | 1     |    | 35-55     | ALYFVSGVCIGLVTLAALVI     | 152  | 29.6 |   |   | -1.662 |
| TMEM159  | multi | II | 44-61     | YLDSPFLAFTLLVFIVM        | 161  | 32.9 |   |   | 1.693  |
| ANO10    | multi | II | 208-228   | IALYFGFLEYFTFALIPMAVI    | 660  | 33   |   |   | 1.133  |
| DAD1     | multi | II | 31-51     | LLYILLTGALQFGYCLLVGTF    | 113  | 36.3 |   |   | 0.006  |
| SPCS2    | multi | II | 87-107    | ICTISCFFAIVALIWDYMHFP    | 226  | 42.9 |   |   | 1.255  |
| PIGG     | multi | II | 432-452   | IYSMMVGTVVVLEVLTLTLLSV   | 983  | 45   | + |   | -0.489 |
| TMEM261  | multi | II | 52-69     | VLSGLGLMGAGGYVYVVA       | 116  | 50.9 |   |   | 2.007  |
| SLC4A2+  | multi | II | 708-731   | CLAAVIFIYFAALSPAITFGGLG  | 1241 | 57.9 | + |   | -0.458 |
| PEX13    | 1     |    | 227-251   | AATSAKSWIFLFFAVILGGPYLIW | 403  | 59.3 |   |   | 0.039  |
| NOC4L    | multi |    | 297-317   | ACDLGGALSLLALNGLFILI     | 516  | 59.5 |   |   | 0.828  |
| TMEM199+ | multi | II | 146-166   | LVITIFNFIVTVVAAFVCTYL    | 208  | 75   |   |   | -0.893 |
| STX17    | multi |    | 229-249   | LAALPVAGALIGMVGGPGL      | 302  | 79.1 |   |   | 2.128  |
| TMEM55B  | multi | II | 212-232   | ICCFLLGLLLAVTATGLAFG     | 277  | 80.1 |   |   | -1.224 |
| WDR11    | 1     |    | 1127-1147 | ALLVLLSLGCFFSVAETLHSM    | 1224 | 92.9 |   |   | 1.344  |
| MOSPD2   | 1     | TA | 497-518   | LLLSLTMLLLAFVTSFFYLLYS   | 518  | 97.9 |   |   | -2.495 |
| JPH2     | 1     | TA | 675-695   | ILICMVILLNIGLAILFVHLL    | 696  | 98.4 |   |   | -2.333 |

## TRAM1

|         |       |     |         |                             |      |      |   |  |        |
|---------|-------|-----|---------|-----------------------------|------|------|---|--|--------|
| GALNT3  | 1     | II  | 20-37   | FWKLGAVIFFFIIVLVLM          | 633  | 3    | + |  | -2.143 |
| ERLIN2  | 1     | II  | 4-24    | LGAVVAVASSFFCASLFSAVH       | 339  | 4.1  | + |  | 1.947  |
| NEU1    | 1     |     | 19-42   | ILGFVGGCRVWVFAAIFLLSLAA     | 415  | 7.2  | + |  | -1.607 |
| KCNN4   | multi | II  | 29-49   | LVLAGTGIGLMVLHAEMLWF        | 427  | 9.1  |   |  | 0.656  |
| CLN5    | 1     | II  | 24-44   | ASWCWALALLWLAVVPGWSRV       | 358  | 9.5  | + |  | -0.338 |
| PLD3    | 1     | II  | 39-59   | VLLVLILAVVGFGALMTQLFL       | 490  | 10   | + |  | -1.979 |
| LYRIC   | 1     | III | 49-69   | GWVILVGTGALGLLLFLLGY        | 582  | 10.1 |   |  | -2.037 |
| LNPEP   | 1     | II  | 111-131 | MVVCASFVIVVAVSVIMVIYLLPRCT  | 1025 | 11.8 | + |  | -2.784 |
| P4HTM   | 1     | II  | 61-81   | FLVLMVFVHLYLGNVLALLLF       | 563  | 12.6 | + |  | -0.816 |
| SEC11A  | 1     | II  | 17-36   | QLYYQVLNFGMIVSSALMIW        | 185  | 14.6 |   |  | 2.116  |
| DEGS1   | multi | II  | 41-61   | PNLIWIIIMVLTQLGAFYIV        | 323  | 15.8 |   |  | -0.478 |
| PLP2    | multi | II  | 25-45   | GILLFAEIIICLVILICFSAS       | 152  | 23   | + |  | -2.274 |
| TMEM223 | multi | II  | 44-64   | FTILGLFCAGQGVFWASMAV        | 202  | 26.7 |   |  | 1.206  |
| TOR4A   | 1     |     | 122-138 | CLLLLVAIVGFQVLNAIENLDDNAQRY | 423  | 30.7 |   |  | 5.049  |
| STEAP3  | multi | II  | 208-228 | LLPAWKVPTLLALGLFVCFYA       | 488  | 44.7 | + |  | 0.176  |
| BNIP3L  | 1     | TA  | 188-208 | VFIPSLFLSHVLALGLGIYIG       | 219  | 90.4 |   |  | 0.499  |
| JPH1    | 1     | TA  | 640-660 | IMIVLVMLNIGLAILFVHFL        | 661  | 98.3 |   |  | -1.838 |

## Sec62

|         |       |     |         |                              |      |      |   |   |        |
|---------|-------|-----|---------|------------------------------|------|------|---|---|--------|
| PIEZO1  | multi | II  | 5-25    | VLGAVLYWLLPCALLAACLL         | 2521 | 1    | + | 2 | -1.673 |
| PIGN    | multi |     | 2-24    | LLFFTGLLIHFVFFASIFDIYF       | 931  | 1.3  | + | 1 | -2.669 |
| PIGO    | multi |     | 4-24    | ASVLLFLAWVCFLFYAGIALF        | 1089 | 1.3  | + | 1 | -2.349 |
| ERAP1   | 1     | II  | 2-21    | VFLPLKWSLATMSFLLSLL          | 948  | 1.3  | + |   | 1.904  |
| SLC20A2 | multi | III | 6-26    | YLWMVILGFIIAFILAFSVGA        | 652  | 2.5  |   |   | -2.740 |
| B3GALTL | 1     | II  | 7-27    | WWLLAPPALLALLTCSLAFGL        | 498  | 3.4  | + |   | -0.935 |
| MBOAT7  | multi | III | 6-22    | WTYLVVLLISIPIGFLF            | 472  | 3.4  | + |   | -0.795 |
| FAM20B  | 1     | II  | 7-25    | VVLLAILLVIFITKVFLI           | 409  | 3.9  | + |   | -2.577 |
| ERLIN2  | 1     | II  | 4-24    | LGAVVAVASSFFCASLFSAVH        | 339  | 4.1  | + |   | 1.947  |
| LRRC8C  | multi | II  | 23-43   | WWDVFTDYLVSAMLMIGVFGC        | 803  | 4.1  | + | 1 | 2.157  |
| AGPAT4  | multi | II  | 11-31   | FLCHLVFCYVFISGLIINTI         | 378  | 5.6  |   | 1 | -0.023 |
| MOGS    | 1     | II  | 39-59   | STAGGVALAVVVLALGMSG          | 837  | 5.9  | + |   | 0.513  |
| UXS1    | 1     | II  | 20-40   | LLLGIALLAYVASVWGNFVNM        | 425  | 7.1  | + |   | 1.544  |
| SLC7A2  | multi | II  | 38-59   | DLIALGVGSTLGAGVYVLAGEV       | 658  | 7.3  | + |   | 2.693  |
| POMK    | 1     | II  | 21-43   | VGLLLIMALMNTLLYLCLDHFFI      | 350  | 8.9  | + |   | -0.095 |
| CLN5    | 1     | II  | 24-44   | ASWCWALALLWLAVVPGWSRV        | 358  | 9.5  | + |   | -0.338 |
| LNPEP   | 1     | II  | 111-131 | MVVCASFVIVVAVSVIMVIYLLPRCT   | 1025 | 11.8 | + |   | -2.784 |
| P4HTM   | 1     | II  | 61-81   | FLVLMVFVHLYLGNVLALLLF        | 563  | 12.6 | + |   | -0.816 |
| BST2    | 1     | II  | 21-48   | KLLLGIGILVLLIIVILGVPLIIFTIKA | 180  | 18.9 | + |   | -5.685 |
| VANGL2  | multi | II  | 109-129 | VAAGATLALLSFLTPLAFLL         | 521  | 22.8 |   |   | -0.566 |
| CNNM2   | multi |     | 251-271 | FLLPFWLQVIFISLLCLSGM         | 875  | 29.8 | + |   | -1.562 |
| AGPAT3  | multi | II  | 125-145 | ELLYVPLIGWTWYFLEIVFCK        | 376  | 35.9 |   | 1 | 2.308  |
| YIPF2   | multi | II  | 125-145 | FWICATLAFVLAVTGNLTVL         | 316  | 42.7 |   |   | -0.977 |

|          |       |    |           |                        |      |      |   |   |        |
|----------|-------|----|-----------|------------------------|------|------|---|---|--------|
| TOR1AIP2 | 1     |    | 215-235   | FWSYGPVILVVLVVAVVASSV  | 470  | 47.9 | + |   | -0.371 |
| ARL6IP6  | multi | II | 111-131   | ILCSLLFAILLAFLLAIAAYLI | 226  | 53.5 |   |   | -4.18  |
| RNF5     | multi | II | 118-138   | GGFHFSGVGAFFPFGFTTVF   | 180  | 71.1 |   |   | 2.186  |
| ITPR3    | multi | II | 2203-2223 | LWGSISFNLAVFIIIAFFY    | 2671 | 82.9 |   | 1 | 0.138  |

### Sec63

|          |       |     |           |                              |      |      |   |   |        |
|----------|-------|-----|-----------|------------------------------|------|------|---|---|--------|
| TMTC3    | multi | II  | 9-29      | ITLIVGVVTACYWNSLFCGFV        | 914  | 2.1  | + | 2 | 1.675  |
| SLC20A2  | multi | III | 6-26      | YLWMVILGFIIAFILAFSVGA        | 652  | 2.5  |   |   | -2.74  |
| GALNT13  | 1     | II  | 5-27      | VYCKVVLATSLMWVLVDVFLLLY      | 556  | 2.7  | + |   | -0.402 |
| FAM20B   | 1     | II  | 7-25      | VVLLAILLVIFIFTKVFLI          | 409  | 3.9  | + |   | -2.577 |
| STT3A    | multi | II  | 18-38     | LKLLILSMAAVLSFSTRFAV         | 705  | 4    | + | 1 | -0.285 |
| LRRC8C   | multi | II  | 23-43     | WWDVFTDYLVSAMLMIGVFGC        | 803  | 4.1  | + | 1 | 2.157  |
| LRRC8E   | multi | II  | 23-43     | WWDVLAEYLTVAMLMIGVFGC        | 796  | 4.1  | + | 1 | 1.41   |
| ILVBL    | 1     |     | 13-33     | LFPSFLLACGLTVAALLGAA         | 510  | 4.5  |   |   | -0.86  |
| MGAT2    | 1     | II  | 10-29     | VLILTLVVAACGFVLWSSNG         | 447  | 4.5  | + |   | 0.142  |
| GLT8D1   | 1     |     | 8-28      | IIILVLAVALFLLVLHNFSL         | 371  | 4.9  | + |   | -0.938 |
| AGPAT4   | multi | II  | 11-31     | FLCHLVFCYVFIIASGLIINTI       | 378  | 5.6  |   | 1 | -0.023 |
| DGKE     | 1     |     | 22-42     | LILWTLCSVLLPVFITFWCSL        | 567  | 5.6  |   |   | -1.593 |
| UXS1     | 1     | II  | 20-40     | LLLGIALLAYVASVWGNFVNM        | 425  | 7.1  | + |   | 1.544  |
| ATP2C1   | multi | II  | 71-91     | LWKKYISQFKNPLIMLLASA         | 919  | 8.8  |   |   | 4.913  |
| GGCX     | multi | II  | 61-81     | PASLAVFRFLFGFLMVLDIPQ        | 758  | 9.4  | + | 2 | 1.521  |
| CLN5     | 1     | II  | 24-44     | ASWCWALALLWLAVVPGWSRV        | 358  | 9.5  | + |   | -0.338 |
| NIPA1    | multi | III | 28-48     | VSLGLGVAVVSSLVNGSTFVL        | 329  | 11.6 |   |   | 2.618  |
| ELOVL1   | multi | III | 23-43     | PLMGSPLLMTSILLTYVYFVL        | 279  | 11.8 |   |   | 0.248  |
| APMAP    | 1     | II  | 41-61     | VTFLMLAVSLTVPLLGAMMLL        | 416  | 12.3 | + |   | -0.556 |
| MAN1B1   | 1     | II  | 85-105    | MILFLAFLFLFCGLLFYINLA        | 699  | 13.6 |   |   | -3.78  |
| IKBIP    | 1     |     | 46-62     | CLSLLSLGTCLGLAWFV            | 377  | 13.8 | + |   | 0.469  |
| BST2     | 1     | II  | 21-48     | KLLLGIGILVLLIIVILGVPLIIFTIKA | 180  | 18.9 | + |   | -5.685 |
| VANGL2   | multi | II  | 109-129   | VAAGATLALLSFLTPLAFLLL        | 521  | 22.8 |   |   | -0.566 |
| ALG9     | multi | II  | 136-156   | ILVFYFLRCLLAFVSCICELY        | 618  | 23.6 | + | 1 | -0.274 |
| TMEM181  | multi | II  | 153-173   | HFVLVVFVFFICFLTIFVGI         | 612  | 26.6 |   |   | -2.195 |
| UBIAD1   | multi | II  | 83-103    | LLVGCAVAVLAVHGAGNLVNT        | 338  | 27.5 |   |   | 2.583  |
| CNNM2    | multi | II  | 251-271   | FLLPFWLQVIFISLLCLSGM         | 875  | 29.8 | + |   | -1.562 |
| MARVELD2 | multi | II  | 195-215   | ILGVVELLLGAGVFACVTAYI        | 558  | 36.7 |   |   | 0.073  |
| YIPF2    | multi | II  | 125-145   | FWICATLAFVLAFTGNLTLVL        | 316  | 42.7 |   |   | -0.977 |
| TEX2     | multi | II  | 475-495   | TLGFFIMCVVYVYLILPLPHYV       | 1127 | 43   |   |   | 0.228  |
| ARL6IP6  | multi | II  | 111-131   | ILCSLLFAILLAFLLAIAAYLI       | 226  | 53.5 |   |   | -4.18  |
| TBC1D9B  | 1     |     | 668-688   | LSWFLTLFLSVMPFESAVVIV        | 1233 | 55   |   |   | 0.956  |
| UNC80    | multi |     | 2268-2288 | PFVLQLFASVAPLLEFPDAAN        | 3258 | 69.9 |   |   | 4.606  |
| TMEM199  | multi | II  | 146-166   | LVITIFNFIVTVVAAAFVCTYL       | 208  | 75   |   |   | -0.893 |
| PARP16   | 1     | TA  | 288-308   | SHWFTVMISLYLLLLLIVSVI        | 322  | 92.5 |   |   | -1.133 |

### Sec62+Sec63

|         |       |     |         |                              |     |      |   |   |        |
|---------|-------|-----|---------|------------------------------|-----|------|---|---|--------|
| SLC20A2 | multi | III | 6-26    | YLWMVILGFIIAFILAFSVGA        | 652 | 2.5  |   |   | -2.740 |
| FAM20B  | 1     | II  | 7-25    | VVLLAILLVIFIFTKVFLI          | 409 | 3.9  | + |   | -2.577 |
| LRRC8C  | multi | II  | 23-43   | WWDVFTDYLVSAMLMIGVFGC        | 803 | 4.1  | + | 1 | 2.157  |
| AGPAT4  | multi | II  | 11-31   | FLCHLVFCYVFIIASGLIINTI       | 378 | 5.6  |   | 1 | -0.023 |
| UXS1    | 1     | II  | 20-40   | LLLGIALLAYVASVWGNFVNM        | 425 | 7.1  | + |   | 1.544  |
| CLN5    | 1     | II  | 24-44   | ASWCWALALLWLAVVPGWSRV        | 358 | 9.5  | + |   | -0.338 |
| BST2    | 1     | II  | 21-48   | KLLLGIGILVLLIIVILGVPLIIFTIKA | 180 | 18.9 | + |   | -5.685 |
| VANGL2  | multi | II  | 109-129 | VAAGATLALLSFLTPLAFLLL        | 521 | 22.8 |   |   | -0.566 |
| CNNM2   | multi | II  | 251-271 | FLLPFWLQVIFISLLCLSGM         | 875 | 29.8 | + |   | -1.562 |
| YIPF2   | multi | II  | 125-145 | FWICATLAFVLAFTGNLTLVL        | 316 | 42.7 |   |   | -0.977 |
| ARL6IP6 | multi | II  | 111-131 | ILCSLLFAILLAFLLAIAAYLI       | 226 | 53.5 |   |   | -4.180 |

**Component** (protein in **bold** face); Client protein; TMDs, number of transmembrane domains in client (including TMH); 1, single spanning; multi, multispanning; Type, membrane protein type; TA, tail anchor; TMH, most N-terminal transmembrane domain; TMH Sequence, primary structure of TMH; Size, number of amino acid residues of client; %, distribution of TMH in client (i.e. position of central amino acid residue of TMH in % of client primary structure); N, N-glycosylation; ERL-D, number of ER luminal domains with a content of > 50 amino acid residues; ΔG, apparent Delta G for membrane insertion of TMHs (<http://dgpred.cbr.su.se>); # highlights overlap between Sec61 and EMC clients; + highlights overlap between TRAP and EMC clients. Notably, Sec62+Sec63 represents the client overlap. MP types shown in red were determined by employing the most advanced prediction tool for this purpose (<https://dtu.biolib.com/DeepTMHMM/>).

Table S5. Apparent  $\Delta G$  values for membrane insertion of TMHs from MP clients of components for targeting to and/or insertion into the human ER membrane.

|                     | Component | Mean value | sem   |
|---------------------|-----------|------------|-------|
| <b>TARGETING</b>    | SR        | 0.501      | 0.397 |
|                     | SND2      | -0.416     | 0.37  |
|                     | WRB       | -0.287     | 0.303 |
|                     | PEX3      | -0.834     | 0.494 |
| <b>INSERTION</b>    | EMC       | 0.361      | 0.292 |
|                     | SEC61     | -0.073     | 0.23  |
|                     | SEC62     | -0.583     | 0.407 |
|                     | SEC63     | -0.183     | 0.374 |
|                     | TRAP      | 0.095      | 0.254 |
|                     | TRAM1     | -0.273     | 0.497 |
| <b>TA-TARGETING</b> | SND2      | -3.239     | 0.358 |
|                     | WRB       | -2.523     | 0.438 |
|                     | PEX3      | -3.093     | 0.986 |
| <b>TA-INSERTION</b> | EMC       | -1.71      | 1.78  |
|                     | SEC61     | -1.573     | 0.378 |
|                     | TRAP      | -2.414     | 0.081 |
|                     | TRAM1     | -0.670     | 1.169 |

|                     | Component 1 | Component 2 | <i>p</i> value |
|---------------------|-------------|-------------|----------------|
| <b>TARGETING</b>    | SR          | SND2        | 0.491          |
|                     | SR          | WRB         | 0.339          |
|                     | SR          | PEX3        | <b>0.019</b>   |
|                     | SND2        | WRB         | 0.528          |
|                     | SND2        | PEX3        | <b>0.062</b>   |
|                     | WRB         | PEX3        | <b>0.058</b>   |
| <b>INSERTION</b>    | EMC         | SEC61       | 0.552          |
|                     | EMC         | SEC62       | <b>0.107</b>   |
|                     | EMC         | SEC63       | <b>0.145</b>   |
|                     | EMC         | TRAP        | 0.829          |
|                     | EMC         | TRAM1       | <b>0.149</b>   |
|                     | SEC61       | SEC62       | 0.471          |
|                     | SEC61       | SEC63       | 0.589          |
|                     | SEC61       | TRAP        | 0.724          |
|                     | SEC61       | TRAM1       | 0.463          |
|                     | SEC62       | SEC63       | 0.278          |
|                     | SEC62       | TRAP        | <b>0.136</b>   |
|                     | SEC62       | TRAM1       | 1.000          |
|                     | SEC63       | TRAP        | 0.422          |
|                     | SEC63       | TRAM1       | 0.929          |
|                     | TRAP        | TRAM1       | 0.619          |
| <b>TA-TARGETING</b> | SND2        | WRB         | 0.285          |
|                     | SND2        | PEX3        | 0.465          |
|                     | WRB         | PEX3        | 0.715          |
| <b>TA-INSERTION</b> | EMC         | SEC61       | 0.655          |
|                     | EMC         | TRAP        | 0.655          |
|                     | EMC         | TRAM1       | 0.655          |
|                     | SEC61       | TRAP        | <b>0.180</b>   |
|                     | SEC61       | TRAM1       | 0.655          |
|                     | TRAP        | TRAM1       | <b>0.180</b>   |

The average apparent  $\Delta G$  values for membrane insertion for TMHs of clients of four targeting components (SR, Snd2, Wrb, PEX3) and six membrane insertion components (Sec61, Sec62, Sec63, TRAMP, TRAM1, EMC) were determined (<http://dgpred.cbr.su.se>), taken from Tables S3 and S4, averaged and comparatively shown together with selected *p* values, as determined by the Wilcoxon signed-rank test using the SPSS software (version 27; IBM Corporation, Armonk, NY, USA).

**Table S6.** Protein transport components/*complexes* in HeLa cells and linked human diseases.

| Component/subunit                                 | Abundance <sup>1</sup> | Location <sup>2</sup> | Linked Human Diseases <sup>3</sup>          |
|---------------------------------------------------|------------------------|-----------------------|---------------------------------------------|
| <b>for ER targeting</b>                           |                        |                       |                                             |
| LRRC59 <sup>4</sup> (LRC59, p34) <sup>5</sup>     | 2480                   | ERM                   |                                             |
| RRBP1 <sup>4</sup> (p180))                        | 135                    | ERM                   | Hepatocellular Carcinoma, Colorectal Cancer |
| KTN1 (Kinectin 1)                                 | 263                    | ERM                   |                                             |
| AEG-1 (LYRIC, MTDH)                               | 575                    | ERM                   |                                             |
| SRP <sup>4,6</sup>                                |                        | C                     |                                             |
| - SRP72                                           | 355                    |                       | Aplasia, Myelodysplasia                     |
| - SRP68                                           | 197                    |                       |                                             |
| - SRP54                                           | 228                    |                       | Neutropenia, Pancreas Insufficiency         |
| - SRP19                                           | 33                     |                       |                                             |
| - SRP14                                           | 4295                   |                       | Prostate Cancer                             |
| - SRP9                                            | 3436                   |                       | Hepatocellular & Colorectal Carcinoma       |
| - 7SL RNA                                         |                        |                       | Breast-, Liver-, Lung-, Stomach-Cancer      |
| SRP receptor                                      |                        | ERM                   |                                             |
| - SR $\alpha$ (docking protein)                   | 249                    |                       |                                             |
| - SR $\beta$                                      | 173                    |                       |                                             |
| Snd1                                              | unknown                |                       |                                             |
| Snd receptor                                      |                        | ERM                   |                                             |
| - Snd2 (TMEM208)                                  | 81                     |                       |                                             |
| - Snd3 (TMEM109)                                  | 49                     |                       |                                             |
| PEX19                                             | 80                     | C                     | Zellweger Syndrome                          |
| PEX3                                              | 103                    | ERM,PexM              | Zellweger Syndrome                          |
| PEX16                                             | 9                      | ERM,PexM              | Zellweger Syndrome                          |
| <b>for ER targeting &amp; membrane insertion</b>  |                        |                       |                                             |
| Bag6 complex <sup>4</sup>                         |                        | C                     |                                             |
| - TRC35 (Get4)                                    | 171                    |                       | CDG                                         |
| - Ubl4A                                           | 177                    |                       |                                             |
| - Bag6 (Bat3)                                     | 133                    |                       | Lung Cancer                                 |
| SGTA                                              | 549                    | C                     | Breast Cancer, Lung Cancer                  |
| TRC40 (Asna1, Get3)                               | 381                    | C                     | CDG                                         |
| TA receptor                                       |                        | ERM                   |                                             |
| - Cam1 (CAMLG, Get2)                              | 5                      |                       | CDG                                         |
| - Wrb <sup>7</sup> (CHD5, Get1)                   | 4                      |                       | Congenital Heart Disease                    |
| <b>for ER membrane insertion</b>                  |                        |                       |                                             |
| ERM protein complex                               |                        | ERM                   |                                             |
| - EMC1                                            | 124                    |                       | Visual disorders                            |
| - EMC2                                            | 300                    |                       |                                             |
| - EMC3 <sup>7</sup>                               | 270                    |                       |                                             |
| - EMC4                                            | 70                     |                       |                                             |
| - EMC5 (MMGT1)                                    | 35                     |                       |                                             |
| - EMC6 (TMEM93)                                   | 5                      |                       |                                             |
| - EMC7                                            | 247                    |                       |                                             |
| - EMC8                                            | 209                    |                       |                                             |
| - EMC9                                            | 1                      |                       |                                             |
| - EMC10                                           | 3                      |                       | Developmental Delay                         |
| GEL complex                                       |                        | ERM                   | Glaucoma, Cerebrofaciothoracic Dysplasia    |
| - TMC01 <sup>7</sup>                              | 2013                   |                       |                                             |
| - OPTI (C20Orf24, RAB5IF)                         | 5                      |                       |                                             |
| - CCDC47 (Calumin)                                | 193                    |                       |                                             |
| BOS complex <sup>4</sup>                          |                        | ERM                   |                                             |
| - Nicalin                                         | 99                     |                       |                                             |
| - TMEM147                                         | 21                     |                       |                                             |
| - NOMO                                            | 267                    |                       |                                             |
| PAT complex                                       |                        | ERM                   |                                             |
| - PAT10 (Asterix)                                 |                        |                       |                                             |
| - CCDC47 (Calumin)                                | 193                    |                       |                                             |
| <b>for membrane insertion &amp; translocation</b> |                        |                       |                                             |
| Sec61 complex <sup>4</sup>                        |                        | ERM                   |                                             |
| - Sec61 $\alpha$ 1                                | 139                    |                       | CVID, TKD, Neutropenia, PLD                 |
| - Sec61 $\beta$                                   | 456                    |                       | PLD, Colorectal Cancer                      |
| - Sec61 $\gamma$                                  | 400                    |                       | GBM, Hepatocellular Carcinoma               |

|                                                |       |     |                                                                    |
|------------------------------------------------|-------|-----|--------------------------------------------------------------------|
| Alternative Sec61 complex                      |       | ERM |                                                                    |
| - Sec61α2                                      |       |     |                                                                    |
| - Sec61β                                       | 456   |     |                                                                    |
| - Sec61γ                                       | 400   |     |                                                                    |
| Sec62/63 complex <sup>4</sup>                  |       | ERM |                                                                    |
| - Sec62 (TLOC1)                                | 26    |     | Breast-, Prostate-, Cervix-, Lung-Cancer<br>PLD, Colorectal Cancer |
| - Sec63 (ERj2)                                 | 168   |     |                                                                    |
| TRAM1 <sup>4</sup>                             | 26    | ERM |                                                                    |
| TRAP complex <sup>4</sup>                      |       | ERM |                                                                    |
| - TRAPα (SSR1)                                 | 568   |     |                                                                    |
| - TRAPβ (SSR2)                                 |       |     |                                                                    |
| - TRAPγ (SSR3)                                 | 1701  |     | CDG, Hepatocellular Carcinoma<br>CDG                               |
| - TRAPδ (SSR4)                                 | 3212  |     |                                                                    |
| for folding & assembly                         |       |     |                                                                    |
| ER Chaperones                                  |       |     |                                                                    |
| - BiP (Grp78, HSPA5)                           | 8253  | ERL | HUS                                                                |
| - Calreticulin (CaBP3, ERp60)                  | 14521 | ERL |                                                                    |
| - Calnexin <sup>4</sup>                        | 7278  | ERM |                                                                    |
| - Grp170 (HYOU1)                               | 923   | ERL |                                                                    |
| for covalent modification                      |       |     |                                                                    |
| Oligosaccharyltransferase (OST-A) <sup>4</sup> |       | ERM |                                                                    |
| - Ribophorin I (Rpn1)                          | 1956  |     |                                                                    |
| - Ribophorin II (Rpn2)                         | 527   |     |                                                                    |
| - OST48                                        | 273   |     | CDG                                                                |
| - Dad1                                         | 464   |     |                                                                    |
| - OST4                                         |       |     |                                                                    |
| - TMEM258                                      |       |     |                                                                    |
| - Stt3A*                                       | 430   |     | CDG                                                                |
| - DC2                                          |       |     |                                                                    |
| - Kcp2                                         |       |     |                                                                    |
| Oligosaccharyltransferase (OST-B)              |       |     |                                                                    |
| - Ribophorin I (Rpn1)                          | 1956  |     |                                                                    |
| - Ribophorin II (Rpn2)                         | 527   |     |                                                                    |
| - OST48                                        | 273   |     | CDG                                                                |
| - Dad1                                         | 464   |     |                                                                    |
| - OST4                                         |       |     |                                                                    |
| - TMEM258                                      |       |     |                                                                    |
| - Stt3B*                                       | 150   |     | CDG                                                                |
| - TUSC3                                        |       |     |                                                                    |
| - MagT1                                        | 33    |     | CDG                                                                |
| Signal peptidase (SPC-A)                       |       | ERM |                                                                    |
| - SPC12                                        | 2733  |     |                                                                    |
| - SPC18* (SEC11A)                              |       |     |                                                                    |
| - SPC22/23                                     | 334   |     |                                                                    |
| - SPC25                                        | 94    |     |                                                                    |
| Signal peptidase (SPC-C)                       |       | ERM |                                                                    |
| - SPC12                                        | 2733  |     |                                                                    |
| - SPC21* (SEC11C)                              |       |     |                                                                    |
| - SPC22/23                                     | 334   |     |                                                                    |
| - SPC25                                        | 94    |     |                                                                    |
| GPI transamidase (GPI-T)                       |       | ERM |                                                                    |
| - GPAA1                                        | 9     |     |                                                                    |
| - PIG-K                                        | 38    |     |                                                                    |
| - PIG-S                                        | 86    |     |                                                                    |
| - PIG-T                                        | 20    |     |                                                                    |
| - PIG-U                                        | 42    |     |                                                                    |

The table was adapted from Lang et al. and Sicking et al. and updated [5,6]. <sup>1</sup> Abundance refers to the concentration (nM) in HeLa cells.

<sup>2</sup> Localization refers to the functional intracellular localization(s) of the protein, i.e. C, Cytosol; ERL, ER lumen; ERM, ER membrane; PexM, Peroxisomal membrane. <sup>3</sup> Abbreviations for diseases: CDG, Congenital disorder of glycosylation; CVID, Common variable immunodeficiency; GBM, Glioblastoma; HUS, Hemolytic uremic syndrome; PLD, Polycystic liver disease; TKD, Tubulointerstitial kidney disease. <sup>4</sup> indicates ribosome association. <sup>5</sup> Alternative protein names are given in parentheses. <sup>6</sup> Complexes are indicated by italics. Abbreviations for protein names: BOS, Back of Sec61; EMC, ER membrane complex; GEL, GET- and EMC-like; GET, Guided entry of tail-anchored proteins; GPI, Glycosylphosphatidylinositol; SEC, involved in secretion; SND, SRP-independent; SPC, Signal peptidase; SR, SRP receptor; SRP, Signal recognition particle; SSR, Signal sequence receptor; TA, Tail anchor; TMEM, Transmembrane; TRAM, translocating chain-associating membrane (protein); TRAP, Translocon-associated protein; TRC, Transmembrane recognition complex. <sup>7</sup> indicates Oxa1 superfamily members.
